# Differential ripple propagation along the hippocampal longitudinal axis

Roberto De Filippo<sup>1</sup> and Dietmar Schmitz<sup>12345</sup>

<sup>1</sup> Charité Universitätsmedizin Berlin, corporate member of Freie Universität Berlin, Humboldt-Universität zu Berlin, and Berlin Institute of Health; Neuroscience Research Center, 10117 Berlin, Germany.

<sup>2</sup> German Center for Neurodegenerative Diseases (DZNE) Berlin, 10117 Berlin, Germany.

<sup>3</sup> Charité-Universitätsmedizin Berlin, corporate member of Freie Universität Berlin, Humboldt-Universität Berlin, and Berlin Institute of Health, Einstein Center for Neuroscience, 10117 Berlin, Germany.

<sup>4</sup> Charité-Universitätsmedizin Berlin, corporate member of Freie Universität Berlin, Humboldt-Universität Berlin, and Berlin Institute of Health, NeuroCure Cluster of Excellence, 10117 Berlin, Germany.

<sup>5</sup> Humboldt-Universität zu Berlin, Bernstein Center for Computational Neuroscience, Philippstr. 13, 10115 Berlin, Germany.

\* Correspondence to: [roberto.de-filippo@charite.de](mailto:roberto.de-filippo@charite.de) and [dietmar.schmitz@charite.de](mailto:dietmar.schmitz@charite.de)

**Keywords:** Hippocampal ripples, Ripples propagation

## Abstract

Hippocampal ripples are highly synchronous neural events critical for memory consolidation and retrieval. A minority of strong ripples has been shown to be of particular importance in situations of increased memory demands. The propagation dynamics of strong ripples inside the hippocampal formation are, however, still opaque. We analyzed ripple propagation within the hippocampal formation in a large open access dataset comprising 267 Neuropixel recordings in 49 awake, head-fixed mice. Surprisingly, strong ripples (top 10% in ripple strength) propagate differentially depending on their generation point along the hippocampal longitudinal axis. The septal hippocampal pole is able to generate longer ripples that engage more neurons and elicit spiking activity for an extended time even at considerable distances. Accordingly, a substantial portion of the variance in strong ripple duration ( $R^2 = 0.463$ ) is explained by the ripple generation location on the longitudinal axis. Our results are consistent with a possible distinctive role of the hippocampal septal pole in conditions of high memory demand.

## 32 Introduction

33 Hippocampal ripples are brief oscillatory events detected in the local field potential (LFP) of  
34 the hippocampal formation, these events correspond to the synchronized depolarization of a  
35 substantial number of neurons in various hippocampal subregions (Hulse et al., 2016, Ylinen  
36 et al., 1995). An higher ripple incidence during memory encoding is associated with superior  
37 recall performance (Norman et al., 2019), furthermore, ripple incidence is increased during  
38 successful memory retrieval (Vaz et al., 2019, Carr et al., 2011). Ripples are also involved in  
39 memory consolidation both in awake and sleep conditions (Jadhav et al., 2012, Roux et al.,  
40 2017, Sirota et al., 2003, Girardeau et al., 2009), disrupting awake ripples during learning  
41 causes a persisting performance degradation, the same effect can be achieved by silencing  
42 ripples during post-learning sleep. Accordingly, ripples are considered to play a crucial role in  
43 memory processes and reorganization of memory engrams (Girardeau and Zugaro, 2011,  
44 Buzsáki, 2015, Diba and Buzsáki, 2007, Foster and Wilson, 2006, Xu et al., 2019, Takahashi,  
45 2015, Davidson et al., 2009, Pfeiffer and Foster, 2015, Dragoi and Tonegawa, 2011, Girardeau  
46 et al., 2009). Ripples duration exhibits a skewed distribution with only a minority of long-  
47 duration ripples ( $> 100$  ms). The fraction of long-duration ripples, ripple amplitude and within-  
48 ripple firing rate of both excitatory and inhibitory neurons are increased in both novel contexts  
49 and memory-demanding tasks (Fernández-Ruiz et al., 2019). Reducing ripple duration  
50 artificially causes a degraded working memory performance (Jadhav et al., 2012, Fernández-  
51 Ruiz et al., 2019) and, on the contrary, prolongation induced by optogenetic-activation has a  
52 beneficial effect (Fernández-Ruiz et al., 2019). Importantly, the artificial recruitment of  
53 additional neurons seems to be constrained by pre-existing resting potential dynamics  
54 (Noguchi et al., 2022). Hippocampal-neocortical interactions, suggested to be important for  
55 memory consolidation (Klinzing et al., 2019, Gais et al., 2007, Tukker et al., 2020), are  
56 increased specifically during long-duration compared to short-duration ripples (Ngo et al.,  
57 2020).

58 Ripple amplitude and duration are significantly correlated (Tong et al., 2021, Patel et al., 2013),  
59 moreover, they are both related to the amount of underlying spiking activity (Tong et al., 2021,  
60 Khodagholy et al., 2017). It is possible to combine ripple strength and amplitude by  
61 considering the area of the high-pass filtered envelope ('ripple strength').

62 These results point at a specific role of strong ripples (ripples with high strength) in situations  
63 of high mnemonic demand and are consistent with a possible power law distribution where a  
64 minority of ripples is responsible for a substantial part of memory requirements. For this  
65 reason, it is of interest to identify the possible electrophysiological peculiarities of this

66 subgroup of ripples. Do strong ripples propagate differently compared to common ripples?  
67 Are strong ripples generated homogeneously along the hippocampal longitudinal axis? Do  
68 ripples have a preferred longitudinal directionality? In this study we focused our attention on  
69 ripples generation and propagation within the hippocampal formation. Hippocampal  
70 connectivity with cortical and sub-cortical areas varies considerably along the longitudinal  
71 axis (Moser and Moser, 1998, Fanselow and Dong, 2010) and gene expression, as well,  
72 exhibits both gradual and discrete transitions along the same axis (Vogel et al., 2020, Strange  
73 et al., 2014). Consequently, the hippocampus is considered to be functionally segmented  
74 along its long axis. The different connectivity contributes to explain the functional organization  
75 gradient between a predominantly spatio-visual (septal pole) and emotional (temporal pole)  
76 processing. Ripples generated in the septal and temporal hippocampal pole have already  
77 been shown to be temporally independent and able to engage different neuron  
78 subpopulations, even in the same downstream brain area (Sosa et al., 2020). Consequentially,  
79 a heterogeneous ripple generation chance along the longitudinal axis most probably has an  
80 impact on the frequency with which different brain areas and neurons subgroups are activated  
81 by ripples. Our work is based on a dataset provided by the Allen Institute (Siegle et al., 2021),  
82 this dataset enabled us to study comprehensively ripples features across the septal half of  
83 the hippocampus. Previous studies have looked at ripple propagation along the longitudinal  
84 axes of the hippocampus (Patel et al., 2013, Kumar and Deshmukh, 2020), however, the size  
85 of this dataset made it possible to unveil propagation details previously overlooked.

## 86 **Results**

### 87 **Distance explains most of the ripple strength correlation variability.**

88 We studied ripple propagation along the hippocampal longitudinal axis in an open-access  
89 dataset provided by the Allen Institute. We analyzed the LFP signals across the visual cortex,  
90 hippocampal formation and brain stem (Supplementary Figure 1) simultaneous to ripples  
91 detected in the CA1 of 49 animals (average session duration =  $9877.4 \pm 43.1$  seconds, average  
92 ripple incidence during non-running epochs =  $2.49 \pm 0.12$  per 10s). Ripples ( $n$  ripples =  
93 120462) were detected on the CA1 channel with the strongest ripple activity. Ripple strength  
94 ( $J_{\text{Ripple}}$ ) was calculated as the integral of the filtered LFP envelope between the start and end  
95 points for every detected ripple. Ripple strength and duration are highly correlated in each  
96 session (mean  $r = 0.87 \pm 0.005$ , Supplementary Figure 2). Notably ripple strength correlates  
97 significantly better with the hippocampal population spiking rate on a ripple-to-ripple basis

98 compared to ripple duration alone ( $p = 4.31e-11$ , Supplementary Figure 3). Clear ripples were  
99 observed uniquely in the hippocampal formation (CA1, CA2, CA3, DG, SUB, ProS). Likewise,  
100 ripple-induced voltage deflections (RIVD, integral of the unfiltered LFP envelope) were also  
101 noticeably stronger in hippocampal areas (Supplementary Figure 4B-F). Ripple strength was  
102 noticeably irregular in single sessions both across time and space, even within the CA1 region  
103 (Supplementary Figure 4C). We focused on the variability in ripple strength across pairs of  
104 CA1 recording locations with clear ripple activity ( $n$  CA1 pairs = 303,  $n$  sessions = 46).  
105 Correlation of ripple strength across different CA1 regions was highly variable (Figure 1A-B-  
106 C) with a lower and upper quartiles of 0.66 and 0.87 (mean = 0.76, SEM = 0.01). Distance  
107 between recording location could explain the majority (57.6%) of this variability (Figure 1B)  
108 with the top and bottom quartiles of ripple strength correlation showing significantly different  
109 average distances (Figure 1C-D). Given the correlation variability we asked how reliably a  
110 ripple can travel along the hippocampal longitudinal axis. To answer this question, we looked  
111 at ripples lag in sessions that included both long-distance ( $> 2126.66 \mu\text{m}$ ) and short-distance  
112 ( $< 857.29 \mu\text{m}$ ) CA1 recording pairs ( $n$  sessions = 32,  $n$  CA1 pairs = 64, Figure 1E). Reference  
113 for the lag analysis was always the most medial recording location in each pair. Almost half of  
114 the ripples in long-distance pairs ( $49.3 \pm 2.2\%$ ) were detected in both locations (inside a 120  
115 ms window centered on ripple start at the reference location). Unsurprisingly short-distance  
116 pairs showed a more reliable propagation ( $69.59 \pm 3.51\%$ ). Moreover, lag between long-  
117 distance pairs had a much broader distribution (Figure 1F) and a significantly bigger absolute  
118 lag (Figure 1G). Neither high nor short-distance pairs showed clear directionality (lag long-  
119 distance =  $-1.14 \pm 0.64$  ms, lag short-distance =  $-0.5 \pm 0.41$  ms). Looking at the relationship  
120 between lag and ripple strength in long-distance pairs, however, an asymmetric distribution  
121 was apparent (Figure 1F top), suggestive of a possible interaction between these two  
122 variables: stronger ripples appear to be predominantly associated with positive lags (i.e.  
123 ripples moving medial→lateral). To further investigate this relationship we divided ripples into  
124 two groups: strong (top 10% ripple strength per session at the reference location) and  
125 common (remaining ripples). The septal half of the hippocampus was divided in three sections  
126 with equal number of recordings: medial, central and lateral (Supplementary Figure 5). Strong  
127 ripples identified in the medial section, in opposition to common ripples, showed a markedly  
128 positive lag (lag =  $17.83 \pm 1.02$  ms) indicative of a preferred medial→lateral travelling direction  
129 (Figure 1H top). Surprisingly, the same was not true for strong ripples identified in the lateral  
130 section (lag =  $3.62 \pm 1.05$  ms, Figure 1I). Strong and common ripples lags were significantly  
131 different between medial and lateral locations both in common and strong ripples. A biased

132 direction of propagation can be explained by an unequal chance of ripple generation across  
133 space. We can assume that selecting strong ripples we are biasing our focus towards ripples  
134 whose generation point (seed) is situated nearby our reference location, this would contribute  
135 to explain the unbalanced lag. This notion would, however, fail to explain the different  
136 directionality we observed between strong ripples in medial and lateral locations. This hints  
137 at a more complex situation.

### 138 **Ripples propagates differentially along the hippocampal longitudinal axis.**

139 To analyze the propagation of ripples along the hippocampal longitudinal axis we focused on  
140 sessions from which ripples were clearly detected in at least two different hippocampal  
141 sections at the same time ( $n = 41$ ). We followed the propagation of strong and common ripples  
142 detected in the reference location across the hippocampus (Figure 2A-B) and built an average  
143 spatio-temporal propagation map per session (Figure 2C). Strong and common ripples in the  
144 medial section showed a divergent propagation pattern: strong ripples travelling  
145 medio→laterally and common ripples travelling in the opposite direction (Figure 2D-E). Ripples  
146 detected in the lateral section did not show such strikingly divergent propagation (Figure 2F-  
147 G) whereas, in the central section, the propagation was divergent only laterally and not  
148 medially (Figure 2H-I). This peculiar propagation profile suggests a not previously described  
149 underlying directionality along the hippocampal longitudinal axis and can be possibly  
150 explained by a spatial bias in strong ripples generation. To understand the mechanism  
151 underlying such difference in propagation we examined the location of the seed for each ripple  
152 in sessions in which ripples were clearly detected in every hippocampal section ( $n$  sessions =  
153 25). While we found no differences in the number of ripples detected in each hippocampal  
154 section ( $p$ -value = 0.55, Kruskal-Wallis test), we observed differences regarding ripple  
155 generation. In common ripples, regardless of the reference location, most ripples started from  
156 the lateral section (Figure 3A left). On the other hand, strong ripples displayed a more  
157 heterogenous picture (Figure 3A right). We identified two principles relative to strong ripples  
158 generation: In all hippocampal sections the majority of strong ripples are locally generated,  
159 and a greater number of strong ripples is generated medially than laterally. Looking at the  
160 central section we can appreciate the difference between the number of strong ripples  
161 generated medially and laterally (Figure 3A right, mean medial =  $36.83 \pm 2.66\%$ , mean lateral  
162 =  $20.55 \pm 2.04\%$ ,  $p$ -value =  $3e-05$ , Pairwise Tukey test). Strong and common ripples had  
163 significantly different seed location profiles only in the medial and central section, not in the  
164 lateral section (Figure 3B). These seed location profiles contribute to explain the propagation

165 idiosyncrasies: major unbalances in seeds location cause propagation patterns with clear  
166 directionality, on the contrary, lag measurements hovering around zero are the result of  
167 averaging between two similarly numbered groups of ripples with opposite direction of  
168 propagation. Notably, propagation speed did not change depending on the seed location  
169 (Supplementary Figure 6). The reason why strong ripples are only in a minority of cases  
170 generated in the lateral section remains nevertheless unclear. Using a 'strength conservation  
171 index' (SCI) we measured the ability of a ripple to retain its strength during propagation (a  
172 ripple with SCI = 1 is in the top 10% in all hippocampal sections). We observed that ripples  
173 generated laterally were effectively less able to retain their strength propagating towards the  
174 medial pole (Supplementary Figure 7). This result is not simply explained by differences in  
175 ripple strength along the medio-lateral (M-L) axis, as no such gradient was observed ( $R^2 =$   
176  $0.0012$ , Supplementary Figure 8). Curiously, ripple amplitude showed a weak trend in the  
177 opposite direction ( $r = 0.25$ ,  $p\text{-value} = 7.21e-04$ ), with higher amplitude ripples in the lateral  
178 section (Supplementary Figure 9).

### 179 **The hippocampal medial pole can generate longer ripples able to better engage neural** 180 **networks.**

181 To understand the reason behind the differential propagation we focused uniquely on the  
182 central section, here it was possible to distinguish between ripples generated laterally or  
183 medially ('lateral ripples' and 'medial ripples'). We included in the analysis sessions in which  
184 ripples were clearly detected in each hippocampal section and with at least 100 ripples of  
185 each kind ( $n$  sessions = 24). We looked at spiking activity associated with these two classes  
186 of ripples in the hippocampal formation across the M-L axis ( $n$  clusters per session =  $650.42$   
187  $\pm 33.16$ , Figure 4A-B-C). To compare sessions, we created interpolated maps of the difference  
188 between spiking induced by medial and lateral ripples (Figure 4D). Immediately following  
189 ripple start (0-50 ms, "early phase") spiking was predictably influenced by ripple seed  
190 proximity: in the lateral section lateral ripples induced more spiking (indicated by the blue  
191 color), whereas in the medial section medial ripples dominated (indicated by the red color).  
192 Surprisingly, in the 50-120 ms window post ripple start ("late phase"), medial ripples could  
193 elicit significantly higher spiking activity than lateral ripples along the entire M-L axis (Figure  
194 4E). Dividing clusters in putative excitatory and inhibitory using the waveform duration we  
195 observed the same effect in both types of neurons (Supplementary Figure 10). In accordance  
196 with this result, we found that the medial hippocampal section is able to generate longer  
197 ripples (Figure 4F). An important portion of the variance in ripple duration is indeed explained

198 by location on the M-L axis both in common ( $R^2 = 0.133$ ) and especially in strong ripples ( $R^2$   
199 = 0.463). The observed extended spiking could be due to a increased number of neurons  
200 participating in the ripple, to a higher spiking rate per neuron or a combination of these two  
201 elements. Fraction of active neurons and spiking rate were both significantly higher in medial  
202 ripples (Supplementary Figure 11). Focusing only on the late phase the difference in fraction  
203 of active neurons per ripples between medial and lateral ripples was even more striking  
204 (Cohen's  $d = 1.7$ , Figure 4G). Inversely, in the early phase, lateral ripples could engage more  
205 neurons, although, the effect size was much smaller (Cohen's  $d = 0.39$ ). The same result was  
206 found in relation to the spiking rate, medial ripples caused a significant and considerable  
207 increase in spiking rate in the late phase (Cohen's  $d = 1.75$ , Figure 4H). Dividing again the  
208 clusters into putative excitatory and inhibitory, significant differences between medial and  
209 lateral ripples were present only in the late phase. Spiking frequency and number of engaged  
210 neurons were significantly higher in medial ripples both in putative excitatory and inhibitory  
211 clusters (Supplementary Figure 12). In summary, the prolonged spiking observed in medial  
212 ripples was caused both by an increased number of engaged neurons and a higher spiking  
213 rate per cell, both in putative excitatory and inhibitory neurons. The disparity in network  
214 engagement can possibly be in part explained by electrophysiological differences across  
215 hippocampal sections (e.g. higher firing rate). We did not find differences in the number of  
216 firing neurons (medial = 74.73, lateral = 79.8,  $p$ -value =  $3.56e-01$ , Mann-Whitney U test), we  
217 did, however, found differences in firing rate, waveform duration, and waveform shape  
218 (recovery slope and peak-through ratio, Supplementary Figure 13). Firing rate and waveform  
219 duration exhibited respectively a left- and right-shifted distribution in the lateral section,  
220 reflecting lower firing rate and slower action potentials.

## 221 **Discussion**

222 Our results show for the first time that strong ripples propagate differentially along the  
223 hippocampal longitudinal axis. This propagation idiosyncrasy can be explained by a specific  
224 ability of the hippocampal septal pole (medial section in our analysis) to produce longer ripples  
225 that better entrain the hippocampal network and spread across the longitudinal axis. It was  
226 previously observed that ripples located at the septal and temporal pole are generated  
227 independently from each other, in addition, despite the presence of connections within the  
228 hippocampal longitudinal axis (Witter, 2007, van Strien et al., 2009), in the vast majority of  
229 cases ripples do not propagate to the opposite pole (Sosa et al., 2020). In accordance with

230 these results, we observed a strong effect of spatial distance on ripple strength correlation  
231 confirming a previous study (Nitzan et al., 2022): the strength correlation, predictably, was  
232 higher in CA1 pairs closer to each other. The effect of distance was also apparent on the ripple  
233 chance of propagation, only half of the ripples generated in the septal pole were detected  
234 additionally in the intermediate hippocampus (lateral section in our analysis). This chance is  
235 much higher compared to the ~3.7% reported regarding propagation between opposite poles  
236 (Sosa et al., 2020), it would be interesting to understand whether the temporal pole is also  
237 able to entrain the intermediate hippocampus in similar fashion or it is a peculiarity of the  
238 septal pole. A limitation of our work derives from the dataset being limited to the septal and  
239 intermediate hippocampus.

240 Ripples can arise at any location along the hippocampal longitudinal axis (Patel et al., 2013).  
241 Our analysis shows that ripples are, however, not homogeneously generated across space.  
242 We observed important differences between strong ripples and common ripples generation.  
243 Common ripples followed a gradient with higher generation probability in the intermediate  
244 section and lowest in the septal pole. Strong ripples, on the other hand, were mostly  
245 generated locally (i.e. a strong ripple detected in the medial section is most likely generated  
246 in the medial section itself). Furthermore, only rarely a strong ripple generated in the  
247 intermediate hippocampus is able to propagate towards the septal pole retaining its strong  
248 status (top 10%). Conversely strong ripples generated in the septal pole have a significantly  
249 higher chance of propagate longitudinally and still be in the top 10% in terms of ripple  
250 strength. Notably, this is not consequence of a simple longitudinal gradient in ripple strength,  
251 indeed, we did not observe any difference in ripple strength along the longitudinal axis.  
252 Additionally, we show that ripples generated in the septal pole and in the intermediate  
253 hippocampus have a significantly different ability to engage hippocampal networks in the 50-  
254 120 ms window post ripple start. Ripples generated in the septal pole activate more neurons,  
255 both excitatory and inhibitory, and, moreover, elicit an higher spiking rate per neuron. This  
256 prolonged network activation is reflected by the fact that the position on the longitudinal axis  
257 explains 13.3% and 46.3% of the variability in ripple duration in common and strong ripples  
258 respectively. Consistent with a duration gradient along the longitudinal axis, the temporal  
259 hippocampus has been shown to produce shorter ripples both in awake and sleep conditions  
260 (Sosa et al., 2020).

261 What is the reason that enables the septal pole to generate longer ripples? There might be for  
262 example underlying electrophysiological differences between the septal and intermediate  
263 hippocampus. Looking at units electrophysiological features we found some differences in



264 the waveform shape and duration. We can hypothesize that slower action potentials and,  
265 consequentially, longer refractory periods hinder the ability to sustain protracted high  
266 frequency spiking. Accordingly, we found an increased firing rate and a smaller waveform  
267 duration in the septal pole. This might contribute to explain the prolonged ripples observed in  
268 the septal pole. We can also speculate that the neuromodulatory inputs gradient, monoamine  
269 fibers have been shown to be stronger in the ventral part (Strange et al., 2014), might influence  
270 neurons responses. Serotonin (ul Haq et al., 2016, Wang et al., 2015), noradrenaline (Ul Haq  
271 et al., 2012, Novitskaya et al., 2016) and acetylcholine (Zhang et al., 2021) have all been shown  
272 to suppress ripples. In accordance with this, some ripples are coupled with a reduced  
273 activation of the locus coeruleus and the dorsal raphe nucleus in vivo (Ramirez-Villegas et al.,  
274 2015).

275 Ripples can be subdivided in different types according to the relationship between the  
276 hippocampal LFP and the ripple itself (Ramirez-Villegas et al., 2015). Intriguingly these  
277 subtypes are associated with two different brain-wide networks, the first communicating  
278 preferentially with the associative neocortex and a second one biased towards subcortical  
279 structures. Moreover, these different types of ripples have been proposed to possibly fulfill  
280 different functional roles. Given the different input/output connectivity between septal,  
281 intermediate and temporal hippocampus (Fanselow and Dong, 2010) we hypothesize that  
282 ripple generated at different points of the hippocampal longitudinal axis might as well have  
283 functional differences, with the longer ripples generated septally possibly able to combine the  
284 different kind of informations processed in the distinct hippocampal sections and additionally  
285 relaying the integrated information back to the neocortex in accordance with the two-stage  
286 memory hypothesis (Diekelmann and Born, 2010, Marr, 1971, Buzsáki, 1989, Rasch and Born,  
287 2007, McClelland et al., 1995).

288 Long duration ripples have been shown to be of particular importance in situations of high-  
289 memory demand (Fernández-Ruiz et al., 2019), at the same time, previous studies highlighted  
290 the role of septal hippocampus in memory tasks and information processing (Hock and  
291 Bunsey, 1998, Moser et al., 1993, Moser et al., 1995, Steffenach et al., 2005, Kheirbek et al.,  
292 2013, McGlinchey and Aston-Jones, 2018, Fanselow and Dong, 2010, Maras et al., 2014,  
293 Bradfield et al., 2020, Qin et al., 2020). Our results can contribute to explain the specific role  
294 of septal hippocampus in memory-demanding tasks with its ability of generating particularly  
295 long ripples that are able to strongly engage networks in the entire top half of the hippocampal  
296 formation for an extended time.

## 297 **Materials and Methods**

### 298 **Dataset**

299 Our analysis was based on the Visual Coding - Neuropixels dataset provided by the Allen  
300 Institute and available at  
301 [https://allensdk.readthedocs.io/en/latest/visual\\_coding\\_neuropixels.html](https://allensdk.readthedocs.io/en/latest/visual_coding_neuropixels.html). We excluded 6  
302 sessions because of absence of recording electrodes in CA1 (session ids=732592105,  
303 737581020, 739448407, 742951821, 760693773, 762120172). Furthermore, one session was  
304 excluded (session id = 743475441) because of an artifact in the LFP time series (time was not  
305 monotonically increasing) and two other sessions (session ids = 746083955,  
306 756029989) because of duplicated LFP traces (see  
307 [https://github.com/RobertoDF/Allen\\_visual\\_dataset\\_artifacts/blob/main/check\\_lfp\\_errors\\_fro](https://github.com/RobertoDF/Allen_visual_dataset_artifacts/blob/main/check_lfp_errors_from_files.ipynb)  
308 [m\\_files.ipynb](https://github.com/RobertoDF/Allen_visual_dataset_artifacts/blob/main/check_lfp_errors_from_files.ipynb)). Our analysis was therefore focused on 49 sessions, average animal age =  
309  $119.22 \pm 1.81$ . Sex: males  $n = 38$ , females  $n = 11$ . Genotypes: wt/wt  $n = 26$ , Sst-IRES-  
310 Cre/wt;Ai32(RCL-ChR2(H134R)\_EYFP)/wt  $n = 10$ , Vip-IRES-Cre/wt;Ai32(RCL-  
311 ChR2(H134R)\_EYFP)/wt  $n = 7$ , Pvalb-IRES-Cre/wt;Ai32(RCL-ChR2(H134R)\_EYFP)/wt  $n = 6$ .  
312 Average probe count per session =  $5.73 \pm 0.08$ . Average number of recording channels per  
313 session =  $2129.45 \pm 29.46$ . Probes in each session were numbered according to the position  
314 on the M-L axis, with probe number 0 being the most medial. Channels with ambiguous area  
315 annotations were discarded (e.g. HPF instead of CA1). We found a number of of small artifacts  
316 in a variety of sessions, all this timepoints were excluded from the analysis (for more  
317 informations: [https://github.com/RobertoDF/Allen\\_visual\\_dataset\\_artifacts](https://github.com/RobertoDF/Allen_visual_dataset_artifacts)). Further details  
318 about data acquisition can be found at [https://brainmapportal-live-4cc80a57cd6e400d854-](https://brainmapportal-live-4cc80a57cd6e400d854-f7fdcae.divio-media.net/filer_public/80/75/8075a100-ca64-429a-b39a-569121b612b2/neuropixels_visual_coding_-_white_paper_v10.pdf)  
319 [f7fdcae.divio-media.net/filer\\_public/80/75/8075a100-ca64-429a-b39a-](https://brainmapportal-live-4cc80a57cd6e400d854-f7fdcae.divio-media.net/filer_public/80/75/8075a100-ca64-429a-b39a-569121b612b2/neuropixels_visual_coding_-_white_paper_v10.pdf)  
320 [569121b612b2/neuropixels\\_visual\\_coding\\_-\\_white\\_paper\\_v10.pdf](https://brainmapportal-live-4cc80a57cd6e400d854-f7fdcae.divio-media.net/filer_public/80/75/8075a100-ca64-429a-b39a-569121b612b2/neuropixels_visual_coding_-_white_paper_v10.pdf). Visualization of recording  
321 locations was performed with brainrender (Claudi et al., 2021).

### 322 **Ripples detection**

323 The LFP traces sampled at 1250 Hz were filtered using a 6th order Butterworth bandpass filter  
324 between 120.0 and 250.0. Ripples were detected on CA1 LFP traces, the best channel (higher  
325 ripple strength) was selected by looking at the SD of the envelope of the filtered trace, if  
326 multiple SD peaks were present across space (possibly caused by sharp waves in stratum  
327 radiatum and ripple activity in stratum pyramidale) we subsequently looked at the channel  
328 with higher skewness, in this way we could reliably identify the best ripple channel. The

329 envelope of the filtered trace was calculated using the Hilbert transform (`scipy.signal.hilbert`).  
330 Ripple threshold was set at 5 SDs. Start and stop times were calculated using a 2 SDs  
331 threshold on the smoothed envelope with `window = 5` (`pandas.DataFrame.rolling`) to account  
332 for ripple phase distortions. Ripple amplitude was calculated as the 90th percentile of the  
333 envelope. Ripple duration was limited at  $> 0.015$  s and  $< 0.25$  s. Candidate ripples with starting  
334 times closer than 0.05 s were joined in a single ripple with peak amplitude being the highest  
335 between the candidates. We estimated power density of each candidate using a periodogram  
336 with constant detrending (`scipy.signal.periodogram`) on the raw LFP trace, we checked the  
337 presence of a peak  $> 100$  Hz, candidates not fulfilling this condition were discarded, this  
338 condition was meant to reduce the number of detected false positives. Ripple candidates  
339 detected during running epochs were discarded, an animal was considered to be running if  
340 his standardized speed was higher than the 10th percentile plus 0.06. Candidates were also  
341 discarded if no behavioral data was available. Code for the detection of ripples resides in  
342 'Calculate\_ripples.py'.

### 343 **Correlation and lag analysis**

344 In each session we uniquely used ripples from the CA1 channel with the strongest ripple  
345 activity, we looked at the LFP activity in all brain areas recorded in a window of 100.0 ms pre  
346 ripple start and 200.0 ms post ripple start, this broad windows account for possible travelling  
347 delays due to distance. For each brain area we picked the channel with higher SD of the  
348 envelope of the filtered trace. For each ripple considered we calculated integral of the  
349 envelope of the filtered trace ( $\int$ Ripple) and the integral of the raw LFP (ripple-induced voltage  
350 deflection, RIVD). After discarding channels with weak ripple activity (envelope variance  $< 5$ ),  
351 we computed the pairwise pearson correlation of the envelope traces of CA1 channels  
352 (`pandas.DataFrame.corr`). For the lag analysis we first identified pairs of CA1 that satisfied a  
353 distance requirements. Distance threshold were set at 25% (857.29  $\mu$ m) and 75% (2126.66  
354  $\mu$ m) of the totality of distances. For each ripple detected in the reference channel we identified  
355 the nearest neighbour in the other channel. The analysis was repeated after dividing ripples in  
356 strong (top 10%  $\int$ Ripple) and common ripples (all remaining ripples) per session. Code for the  
357 correlation and lag analysis resides in 'Calculations\_Figure\_1.py'.

### 358 **Ripple spatio-temporal propagation maps and ripple seed analysis**

359 The hippocampus was divided in three section with equal number of recordings. Channels  
360 with weak ripple activity (envelope variance  $< 5$ ) were discarded. Sessions with recording

361 locations only in one hippocampal sections or with less than 1000 ripples in the channel with  
362 strongest ripple activity were discarded as well. For each ripple detected on the reference  
363 CA1 channel we identified ripples in other CA1 channels happening in a window of  $\pm 60.0$  ms,  
364 this events were grouped together in a 'cluster'. If more than one event was detected on the  
365 same probe we kept only the first event. 'Clusters' were subsequently divided according to  
366  $\int$ Ripple on the reference electrode in strong and common ripples. Lag maps were result of  
367 averaging lags for each probe. Code for the calculations of propagation maps resides in  
368 'Calculate\_trajectories.py'.

### 369 **Ripple-associated spiking activity**

370 We focused on sessions with clear ripple activity (envelope variance  $> 5$ ) in all three  
371 hippocampal sections and at least 100 ripples generated both medially and laterally. The  
372 reference was always placed in the central section, here it was possible to identify ripples  
373 generated medially and laterally. We only considered ripples that were detected in at least half  
374 of the recording electrodes (in the code: "spatial engagment"  $> 0.5$ ). For each ripple we  
375 computed a histogram of spiking activity of regions belonging to the hippocampal formation  
376 (HPF) in a window of 0.5 s centered on the ripple start in each probe. We averaged all the  
377 computed histograms to create a spatial profile of spiking activity. To compare spiking activity  
378 between sessions we interpolated (`xarray.DataArray.interp`) the difference between medial  
379 ripples-induced spiking and lateral ripples-induced spiking over space (this was necessary  
380 because probes in each sessions have different M-L coordinates) and time. We calculated the  
381 number of active cells (at least one spike) and spiking rate of each cluster per ripple in a  
382 window of 0.12 s starting from ripple start. We repeated the analysis separating the 0-50 ms  
383 and 50-120 ms post ripple start windows.

### 384 **Units selection and features calculations**

385 Clusters were filtered according to the following parameters: Waveform peak-trough ratio  $<$   
386 5, ISI violations  $< 0.5$ , amplitude cutoff  $< 0.1$  and Presence ratio  $> 0.1$ . For an explanation of  
387 the parameters see  
388 [https://github.com/AllenInstitute/ecephys\\_spike\\_sorting/blob/master/ecephys\\_spike\\_sorting](https://github.com/AllenInstitute/ecephys_spike_sorting/blob/master/ecephys_spike_sorting/modules/quality_metrics/README.md)  
389 [/modules/quality\\_metrics/README.md](https://github.com/AllenInstitute/ecephys_spike_sorting/blob/master/ecephys_spike_sorting/modules/quality_metrics/README.md) and [https://brainmapportal-live-](https://brainmapportal-live-4cc80a57cd6e400d854-f7fdcae.divio-media.net/filer_public/80/75/8075a100-ca64-429a-b39a-569121b612b2/neuropixels_visual_coding_-_white_paper_v10.pdf)  
390 [4cc80a57cd6e400d854-f7fdcae.divio-media.net/filer\\_public/80/75/8075a100-ca64-429a-](https://brainmapportal-live-4cc80a57cd6e400d854-f7fdcae.divio-media.net/filer_public/80/75/8075a100-ca64-429a-b39a-569121b612b2/neuropixels_visual_coding_-_white_paper_v10.pdf)  
391 [b39a-569121b612b2/neuropixels\\_visual\\_coding\\_-\\_white\\_paper\\_v10.pdf](https://brainmapportal-live-4cc80a57cd6e400d854-f7fdcae.divio-media.net/filer_public/80/75/8075a100-ca64-429a-b39a-569121b612b2/neuropixels_visual_coding_-_white_paper_v10.pdf). Firing rate was  
392 calculated on all clusters with presence ratio  $> 0.1$ .

## 393 **Acknowledgements**

394 This study was supported by the German Research Foundation Deutsche  
395 Forschungsgemeinschaft (DFG), project 184695641 - SFB 958, project 327654276 - SFB  
396 1315, Germany's Excellence Strategy - Exc-2049-390688087 and by the European Research  
397 Council (ERC) under the European Union's Horizon 2020 research and innovation programme  
398 (Grant agreement No. 810580). We thank J.T. Tukker, N. Maier for feedback on an early  
399 version of the manuscript and the members of the Schmitz lab for scientific discussion. We  
400 thank Willy Schiegel and Tiziano Zito for technical help with cluster computing. We thank  
401 Federico Claudi for support with brainrender. The authors declare that they have no  
402 competing interests.

## 403 **Contributions**

404 Conceptualization, data curation, formal analysis, investigation, visualization: RDF. Writing -  
405 original draft: RDF. Writing - review & editing: RDF, DS. Funding acquisition: DS.

## 406 **Data and materials availability**

407 All the code used to process the dataset is available at [https://github.com/RobertoDF/De-](https://github.com/RobertoDF/De-Filippo-et-al-2022)  
408 [Filippo-et-al-2022](https://github.com/RobertoDF/De-Filippo-et-al-2022), pre-computed data structures can be downloaded at  
409 [10.6084/m9.figshare.20209913](https://github.com/RobertoDF/De-Filippo-et-al-2022). All figures and text can be reproduced using code present in  
410 this repository, each number present in the text is directly linked to a python data structure.  
411 The original dataset is provided by the Allen Institute and available at  
412 [https://allensdk.readthedocs.io/en/latest/visual\\_coding\\_neuropixels.html](https://allensdk.readthedocs.io/en/latest/visual_coding_neuropixels.html).

## 413 Figures

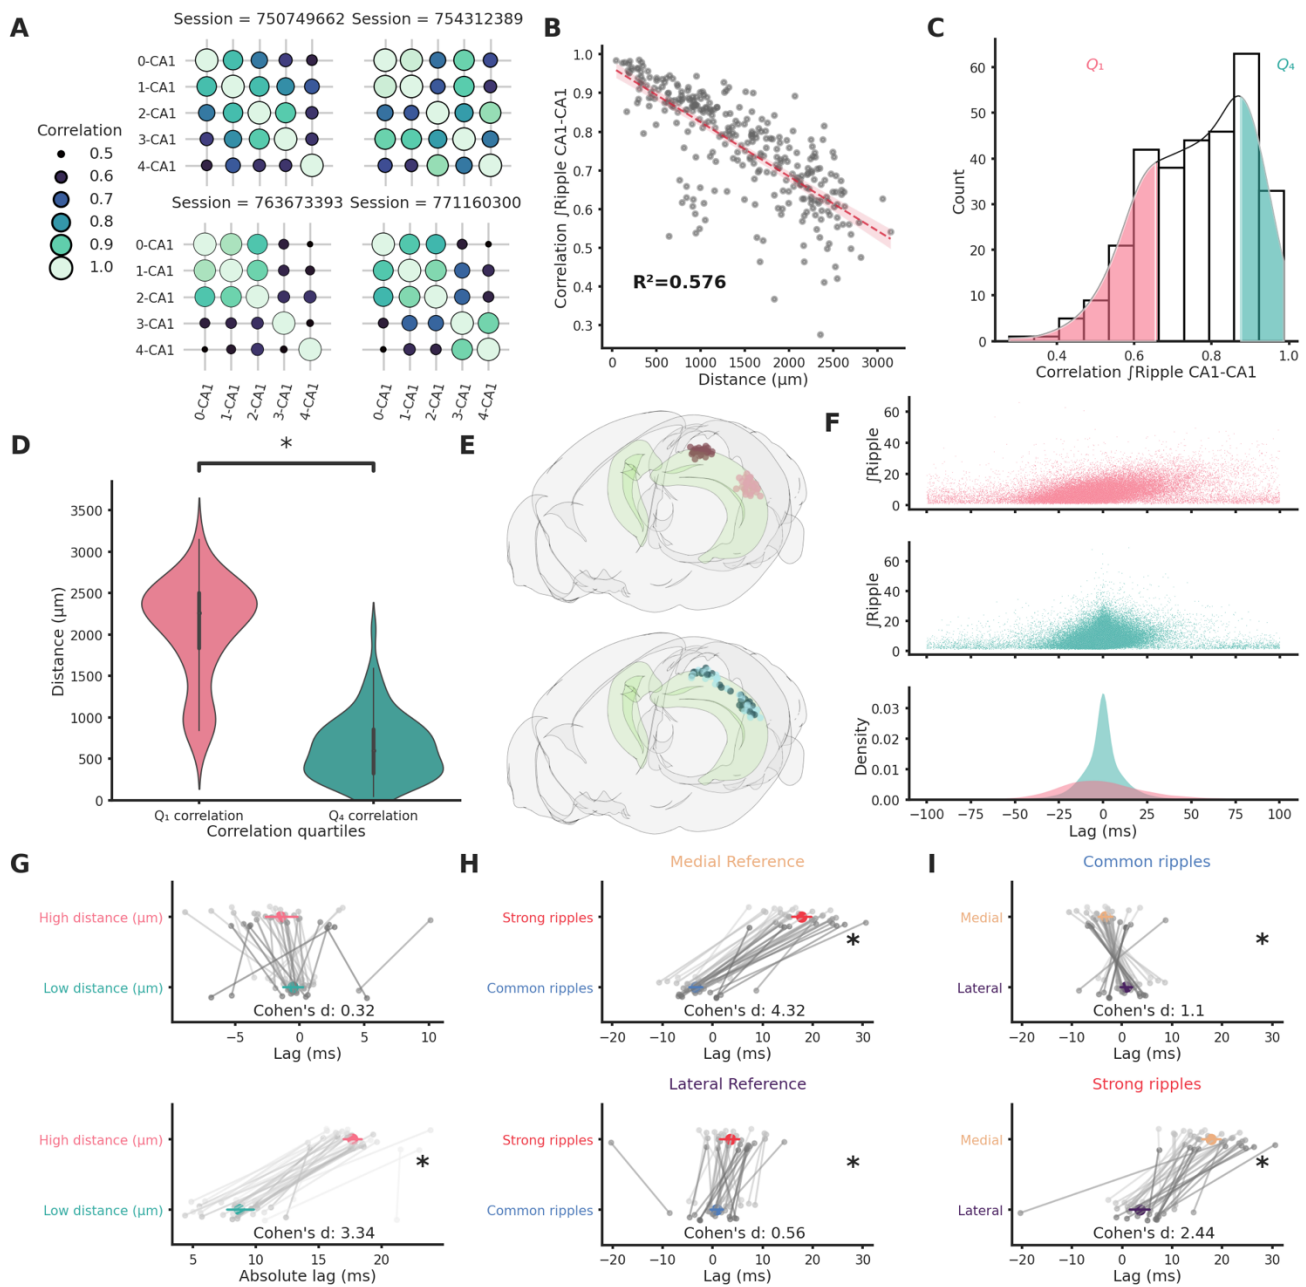

414

415 **Figure 1. Ripple strength correlation depends significantly on distance.**

416 (A) Correlation matrices showing the variability of ripple strength correlation between pairs of  
 417 recording sites located in different CA1 locations in 4 example sessions. The number on the  
 418 x and y axis labels indicates the probe number. Probes are numbered according to the  
 419 position on the hippocampal longitudinal axis (0 is the most medial probe). (B) Scatter plot  
 420 and linear regression showing the relationship between distance and correlation strength.  
 421 Distance between recording sites explains 0.576% of the variability in correlation of ripple  
 422 strength. (C) Ripple strength correlation distribution. Pink represents bottom 25% (<math>Q\_1</math>) and  
 423 blue top 25% (>math>Q\_4</math>). (D) Violinplots showing that the top and bottom correlation quartile show

424 significantly different distance distributions ( $Q_1$ :  $2077.57 \pm 68.68 \mu\text{m}$ ,  $Q_4$ :  $633.56 \pm 44.02 \mu\text{m}$ ,  
425  $p$ -value =  $4.00\text{e-}23$ , Mann-Whitney U test). (E) Top: Rendering of the long distance (top) and  
426 short distance (bottom) CA1 pairs, dark circles are the reference locations in each pair. (F) Top  
427 and middle: scatter plots showing the relationship between ripple strength (at the reference  
428 location) and lag for long distance (top,  $n$  ripples = 31855) and short distance (middle,  $n$  ripples  
429 = 52858) pairs. Bottom: kernel density estimate of the lags of long distance (pink) and short  
430 distance (turquoise) pairs. (G): Lag (top) and absolute lag (bottom) comparison between long  
431 and short distance pairs (top: long distance =  $-1.47 \pm 0.63$  ms, Short distance =  $-0.51 \pm 0.4$   
432 ms,  $p$ -value =  $2.03\text{e-}01$ , Student's t-test; bottom: long distance =  $17.69 \pm 0.38$  ms, Short  
433 distance =  $8.69 \pm 0.56$  ms,  $p$ -value =  $6.58\text{e-}20$ , Student's t-test). (H) Lag comparison in long  
434 distance pairs between common and strong ripples with reference located in the medial (top)  
435 or lateral hippocampal section (bottom) (top: strong ripples =  $17.83 \pm 1.02$  ms, common ripples  
436 =  $-3.27 \pm 0.68$  ms,  $p$ -values =  $2.28\text{e-}25$ , Student's t-test, bottom: strong ripples =  $3.62 \pm 1.05$   
437 ms, common ripples =  $0.88 \pm 0.66$  ms,  $p$ -values =  $3.00\text{e-}02$ , Student's t-test). (I) Lag  
438 comparison in long distance pairs between ripples with reference located in the medial and  
439 lateral section in common (top) or strong ripples (bottom) (top: medial reference =  $-3.27 \pm 0.68$   
440 ms, lateral reference =  $0.88 \pm 0.66$  ms,  $p$ -values =  $4.30\text{e-}05$ , Student's t-test, bottom: strong  
441 ripples =  $17.83 \pm 1.02$  ms, common ripples =  $3.62 \pm 1.05$  ms,  $p$ -values =  $4.30\text{e-}05$ , Student's  
442 t-test).  
443

444

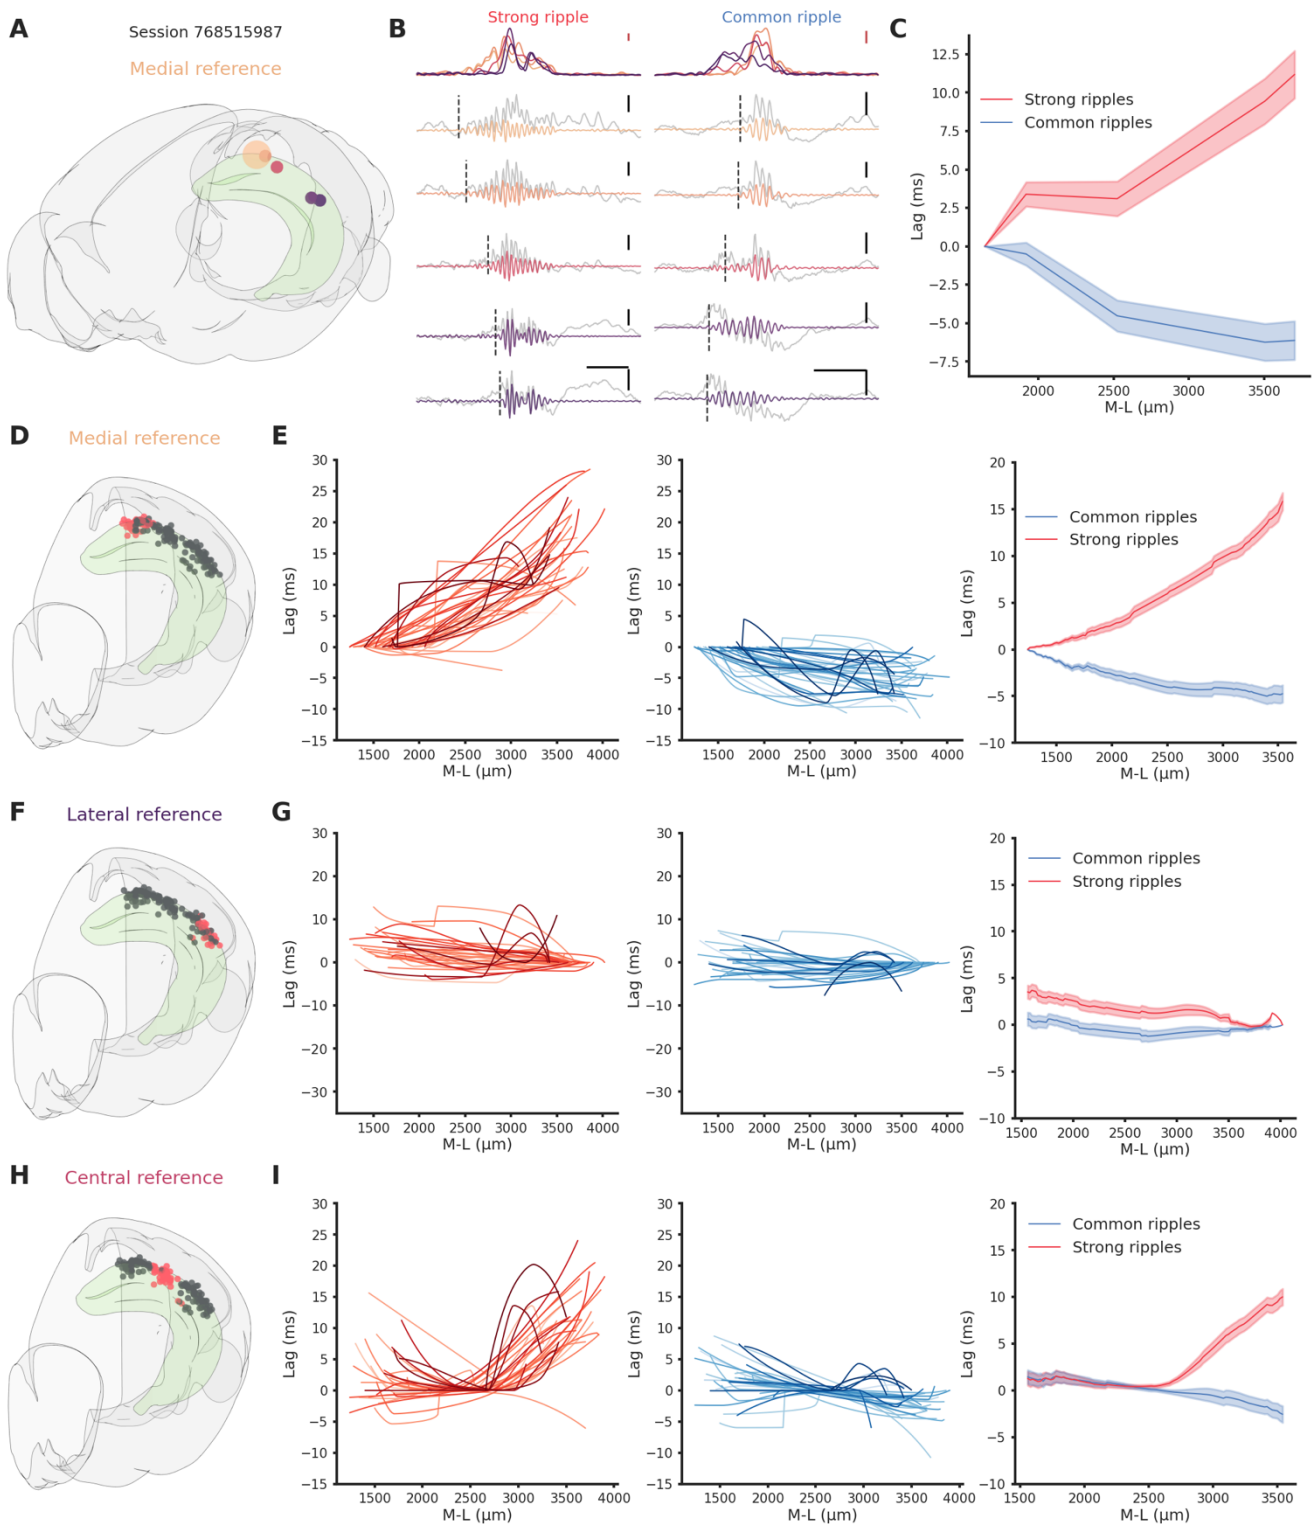

445

446 **Figure 2. Direction-dependent differences in ripple propagation along the hippocampal**  
447 **longitudinal axis.**

448 (A) Recording locations for session 768515987. Circles colors represents medio-lateral  
449 location. Bigger circle represents the reference location. (B) Example propagation of a strong  
450 (left column) and common (right column) ripple across the different recording location from  
451 session 768515987, each filtered ripple is color-coded according to A. Grey traces represents



452 raw LFP signal. Dashed vertical line represents the start of the ripple. In the top row the ripple  
453 envelope across all locations. Black scale bars: 50 ms, 0.5 mV. Red scale bars: 0.1 mV. (C)  
454 Average propagation map of strong and common ripples in session 768515987 across the  
455 medio-lateral axis. (D) Recording locations relative to E. Red circles represents the reference  
456 locations across all sessions (n sessions=41), black circles represents the remaining recording  
457 locations. (E) Left: Medio-lateral propagation of strong ripples, each line represents the  
458 average of one session. Middle: Medio-lateral propagation of common ripples, each line  
459 represents the average of one session. Right: Average propagation map across sessions of  
460 strong and common ripples. Reference locations are the most lateral per session. (F) Same  
461 as D. (G) Same as E. Reference locations are the most lateral per session. (H) Same as D. (I)  
462 Same as E. Reference locations are the most central per session.  
463

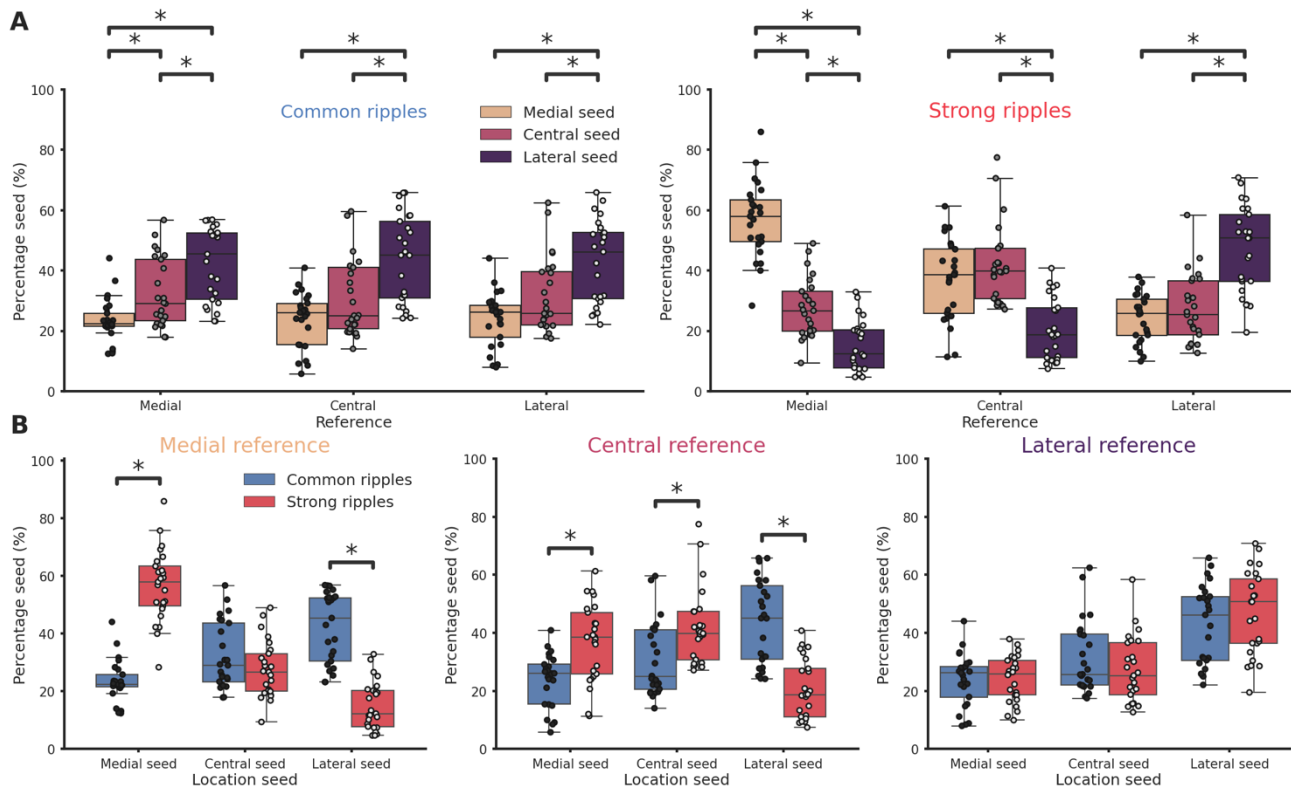

464

465 **Figure 3. Ripples generation differences along the hippocampal longitudinal axis.**

466 (A) Ripple seed location comparison between the three reference locations in common ripples  
 467 (left) and strong ripples (right). Majority of common ripples seeds are located in the lateral  
 468 hippocampal section regardless of the reference location (medial reference/lateral seed =  
 469  $42.43 \pm 2.45$  %, central reference/lateral seed =  $43.77 \pm 2.9$  %, lateral reference/lateral seed  
 470 =  $42.83 \pm 2.75$  %). Strong ripples are mainly local (medial reference/medial seed =  $56.78 \pm$   
 471  $2.48$  %, central reference/central seed =  $41.74 \pm 2.58$  %, lateral reference/lateral seed =  $46.76$   
 472  $\pm 2.89$  %). (B) Ripple seed location comparison between strong and common ripples using a  
 473 medial (left), central (center) or lateral reference (right). Asterisks mean p < 0.05, Kruskal-Wallis  
 474 test with pairwise Mann-Whitney post-hoc test.

475

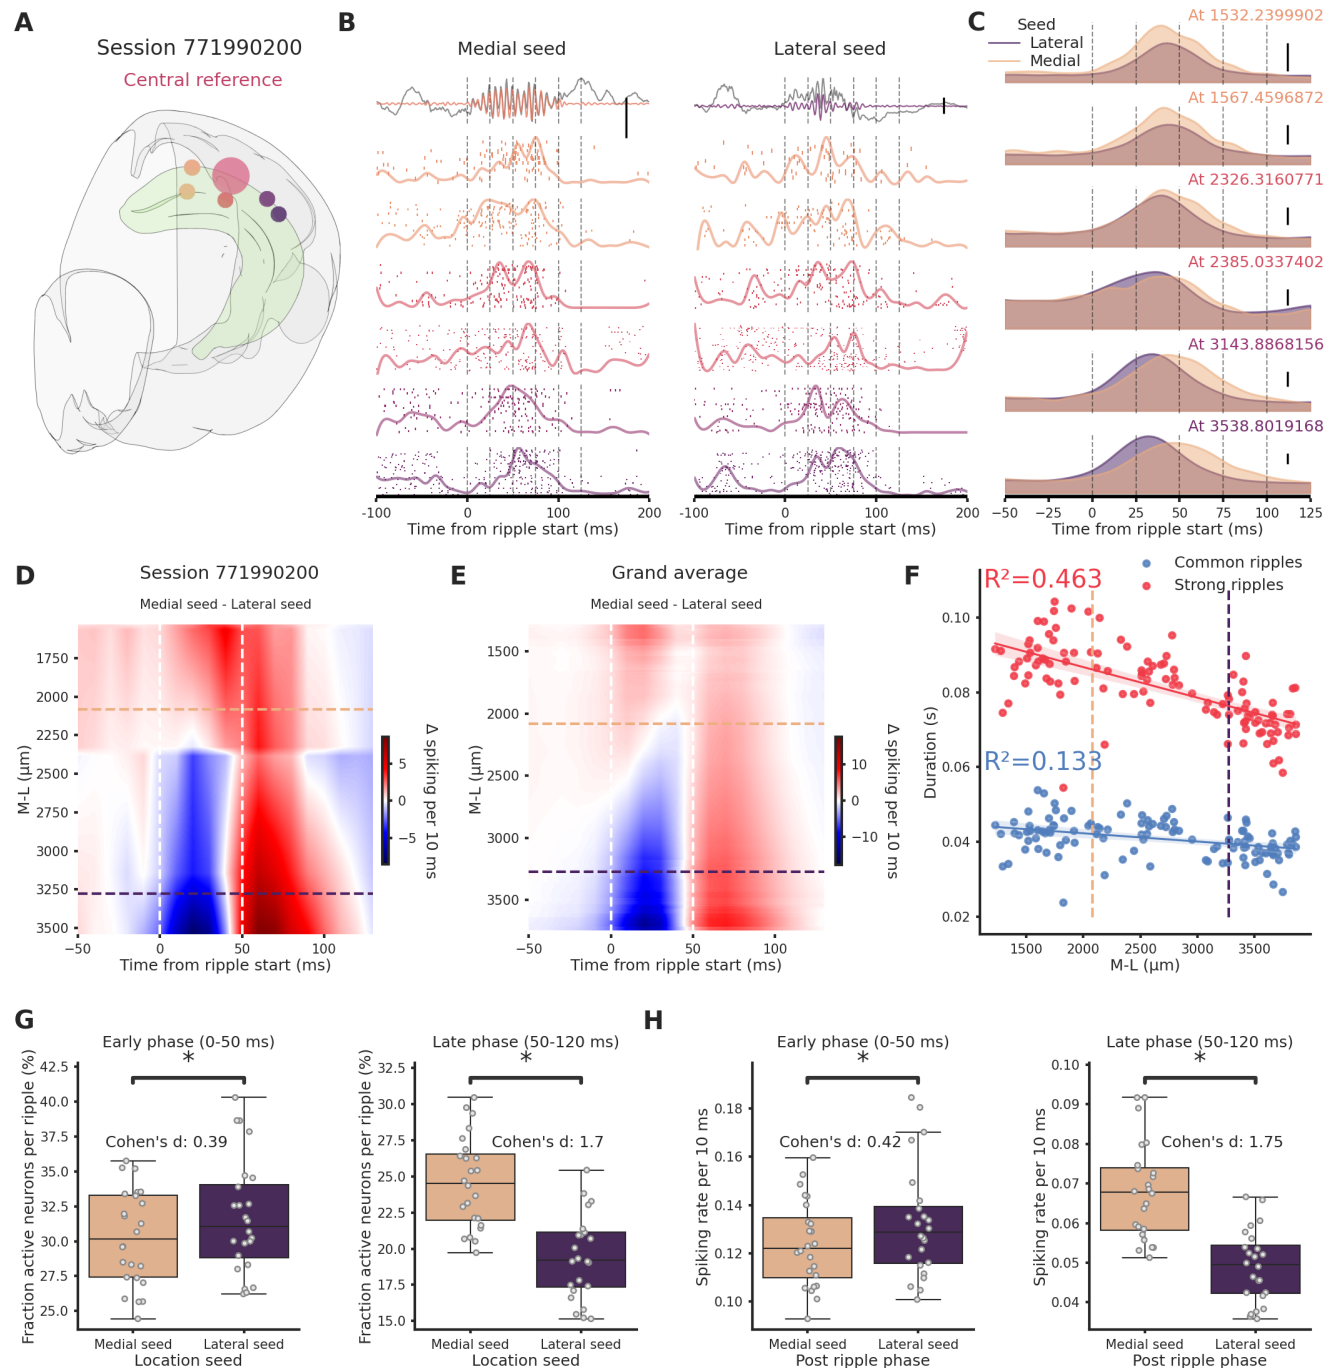

476

477 **Figure 4. Ripples travelling in the medio→lateral direction show prolonged network**  
478 **engagement.**

479 (A) Recording location for session 771990200. Circles colors indicate medio-lateral location.  
480 Bigger circle represents the reference location. (B) Spiking activity across the hippocampal  
481 M-L axis associated with a ripple generated medially (left column) or laterally (right column)  
482 across the different recording location from session 771990200. Spike raster plot and  
483 normalized density are plotted at each M-L location. In the top row filtered ripple, grey traces  
484 represents raw LFP signal. All plots are color coded according to A. Scale bar: 0.5 mV. (C)  
485 Kernel density estimates of the average spiking activity across different M-L locations and  
486 between seed type. Scale bar: 5 spikes per 10 ms. (D) Interpolated heatmap of the difference

487 between medially and laterally generated ripple induced spiking activity in session 771990200.  
488 Vertical dashed lines represent borders between early and late post-ripple start phases.  
489 Horizontal dashed lines represent the spatial limits of the hippocampal sections. (E) Grand  
490 average of the differences between medially and laterally initiated ripple induced spiking  
491 activity across 24 sessions. Vertical dashed lines represent borders between early and late  
492 post-ripple start phases. Horizontal dashed lines represent the spatial limits of the  
493 hippocampal sections. (F) Regression plot between M-L location and ripple duration in  
494 common and strong ripples. Horizontal dashed lines represent the spatial limits of the  
495 hippocampal sections. (G) Average fraction of active neurons in medial (pink) and lateral  
496 (purple) ripples. Early/medial seed =  $0.3 \pm 0.69$ , early/lateral seed:  $31.72 \pm 0.84$ , p-value =  
497  $3.23e-05$ , Student's t-test; late/medial seed =  $24.57 \pm 0.64$ , late/lateral seed =  $19.44 \pm 0.58$ ,  
498 p-value =  $4.09e-07$ , Student's t-test. (H) Average spiking rate medial (pink) and lateral (purple)  
499 ripples. Early/medial seed =  $0.12 \pm 0.004$ , early/lateral seed =  $0.13 \pm 0.005$ , p-value =  $1.35e-$   
500  $04$ , Student's t-test; late/medial seed =  $0.07 \pm 0.002$ , late/lateral seed =  $0.05 \pm 0.002$ , p-value  
501 =  $1.24e-12$ , Student's t-test.  
502

503

504

505

- 506 BRADFIELD, L. A., LEUNG, B. K., BOLDT, S., LIANG, S. & BALLEINE, B. W. 2020. Goal-directed  
507 actions transiently depend on dorsal hippocampus. *Nature Neuroscience*, 23, 1194-1197.
- 508 BUZSÁKI, G. 1989. Two-stage model of memory trace formation: a role for "noisy" brain states.  
509 *Neuroscience*, 31, 551-70.
- 510 BUZSÁKI, G. 2015. Hippocampal sharp wave-ripple: A cognitive biomarker for episodic memory and  
511 planning. *Hippocampus*, 25, 1073-188.
- 512 CARR, M. F., JADHAV, S. P. & FRANK, L. M. 2011. Hippocampal replay in the awake state: a  
513 potential substrate for memory consolidation and retrieval. *Nat Neurosci*, 14, 147-53.
- 514 CLAUDI, F., TYSON, A. L., PETRUCCO, L., MARGRIE, T. W., PORTUGUES, R. & BRANCO, T.  
515 2021. Visualizing anatomically registered data with brainrender. *eLife*, 10, e65751.
- 516 DAVIDSON, T. J., KLOOSTERMAN, F. & WILSON, M. A. 2009. Hippocampal replay of extended  
517 experience. *Neuron*, 63, 497-507.
- 518 DIBA, K. & BUZSÁKI, G. 2007. Forward and reverse hippocampal place-cell sequences during ripples.  
519 *Nat Neurosci*, 10, 1241-2.
- 520 DIEKELMANN, S. & BORN, J. 2010. The memory function of sleep. *Nature Reviews Neuroscience*,  
521 11, 114-126.
- 522 DRAGOI, G. & TONEGAWA, S. 2011. Preplay of future place cell sequences by hippocampal cellular  
523 assemblies. *Nature*, 469, 397-401.
- 524 FANSELOW, M. S. & DONG, H. W. 2010. Are the dorsal and ventral hippocampus functionally distinct  
525 structures? *Neuron*, 65, 7-19.
- 526 FERNÁNDEZ-RUIZ, A., OLIVA, A., FERMINO DE OLIVEIRA, E., ROCHA-ALMEIDA, F.,  
527 TINGLEY, D. & BUZSÁKI, G. 2019. Long-duration hippocampal sharp wave ripples improve  
528 memory. *Science (New York, N.Y.)*, 364, 1082-1086.
- 529 FOSTER, D. J. & WILSON, M. A. 2006. Reverse replay of behavioural sequences in hippocampal place  
530 cells during the awake state. *Nature*, 440, 680-3.
- 531 GAIS, S., ALBOUY, G., BOLY, M., DANG-VU, T. T., DARSAUD, A., DESSEILLES, M., RAUCHS,  
532 G., SCHABUS, M., STERPENICH, V., VANDEWALLE, G., MAQUET, P. & PEIGNEUX, P.  
533 2007. Sleep transforms the cerebral trace of declarative memories. *Proc Natl Acad Sci U S A*,  
534 104, 18778-83.
- 535 GIRARDEAU, G., BENCHENANE, K., WIENER, S. I., BUZSÁKI, G. & ZUGARO, M. B. 2009.  
536 Selective suppression of hippocampal ripples impairs spatial memory. *Nat Neurosci*, 12, 1222-  
537 3.
- 538 GIRARDEAU, G. & ZUGARO, M. 2011. Hippocampal ripples and memory consolidation. *Curr Opin*  
539 *Neurobiol*, 21, 452-9.
- 540 HOCK, B. J., JR. & BUNSEY, M. D. 1998. Differential effects of dorsal and ventral hippocampal  
541 lesions. *The Journal of neuroscience : the official journal of the Society for Neuroscience*, 18,  
542 7027-7032.
- 543 HULSE, B. K., MOREAUX, L. C., LUBENOV, E. V. & SIAPAS, A. G. 2016. Membrane Potential  
544 Dynamics of CA1 Pyramidal Neurons during Hippocampal Ripples in Awake Mice. *Neuron*, 89,  
545 800-13.
- 546 JADHAV, S. P., KEMERE, C., GERMAN, P. W. & FRANK, L. M. 2012. Awake hippocampal sharp-  
547 wave ripples support spatial memory. *Science*, 336, 1454-8.
- 548 KHEIRBEK, M. A., DREW, L. J., BURGHARDT, N. S., COSTANTINI, D. O., TANNENHOLZ, L.,  
549 AHMARI, S. E., ZENG, H., FENTON, A. A. & HEN, R. 2013. Differential control of learning  
550 and anxiety along the dorsoventral axis of the dentate gyrus. *Neuron*, 77, 955-968.
- 551 KHODAGHOLY, D., GELINAS, J. N. & BUZSÁKI, G. 2017. Learning-enhanced coupling between  
552 ripple oscillations in association cortices and hippocampus. *Science*, 358, 369-372.
- 553 KLINZING, J. G., NIETHARD, N. & BORN, J. 2019. Mechanisms of systems memory consolidation  
554 during sleep. *Nature Neuroscience*, 22, 1598-1610.

- 555 KUMAR, M. & DESHMUKH, S. S. 2020. Differential propagation of ripples along the proximodistal  
556 and septotemporal axes of dorsal CA1 of rats. *Hippocampus*, 30, 970-986.
- 557 MARAS, P. M., MOLET, J., CHEN, Y., RICE, C., JI, S. G., SOLODKIN, A. & BARAM, T. Z. 2014.  
558 Preferential loss of dorsal-hippocampus synapses underlies memory impairments provoked by  
559 short, multimodal stress. *Mol Psychiatry*, 19, 811-22.
- 560 MARR, D. 1971. Simple memory: a theory for archicortex. *Philos Trans R Soc Lond B Biol Sci*, 262,  
561 23-81.
- 562 MCCLELLAND, J. L., MCNAUGHTON, B. L. & O'REILLY, R. C. 1995. Why there are  
563 complementary learning systems in the hippocampus and neocortex: insights from the successes  
564 and failures of connectionist models of learning and memory. *Psychol Rev*, 102, 419-457.
- 565 MCGLINCHEY, E. M. & ASTON-JONES, G. 2018. Dorsal Hippocampus Drives Context-Induced  
566 Cocaine Seeking via Inputs to Lateral Septum. *Neuropsychopharmacology*, 43, 987-1000.
- 567 MOSER, E., MOSER, M. & ANDERSEN, P. 1993. Spatial learning impairment parallels the magnitude  
568 of dorsal hippocampal lesions, but is hardly present following ventral lesions. *The Journal of*  
569 *Neuroscience*, 13, 3916-3925.
- 570 MOSER, M. B. & MOSER, E. I. 1998. Functional differentiation in the hippocampus. *Hippocampus*, 8,  
571 608-19.
- 572 MOSER, M. B., MOSER, E. I., FORREST, E., ANDERSEN, P. & MORRIS, R. G. 1995. Spatial  
573 learning with a minislab in the dorsal hippocampus. *Proceedings of the National Academy of*  
574 *Sciences*, 92, 9697-9701.
- 575 NGO, H. V., FELL, J. & STARESINA, B. 2020. Sleep spindles mediate hippocampal-neocortical  
576 coupling during long-duration ripples. *Elife*, 9.
- 577 NITZAN, N., SWANSON, R., SCHMITZ, D. & BUZSÁKI, G. 2022. Brain-wide interactions during  
578 hippocampal sharp wave ripples. *Proc Natl Acad Sci U S A*, 119, e2200931119.
- 579 NOGUCHI, A., HUSZÁR, R., MORIKAWA, S., BUZSÁKI, G. & IKEGAYA, Y. 2022. Inhibition  
580 allocates spikes during hippocampal ripples. *Nat Commun*, 13, 1280.
- 581 NORMAN, Y., YEAGLE, E. M., KHUVIS, S., HAREL, M., MEHTA, A. D. & MALACH, R. 2019.  
582 Hippocampal sharp-wave ripples linked to visual episodic recollection in humans. *Science*, 365,  
583 eaax1030.
- 584 NOVITSKAYA, Y., SARA, S. J., LOGOTHETIS, N. K. & ESCHENKO, O. 2016. Ripple-triggered  
585 stimulation of the locus coeruleus during post-learning sleep disrupts ripple/spindle coupling and  
586 impairs memory consolidation. *Learn Mem*, 23, 238-48.
- 587 PATEL, J., SCHOMBURG, E. W., BERÉNYI, A., FUJISAWA, S. & BUZSÁKI, G. 2013. Local  
588 generation and propagation of ripples along the septotemporal axis of the hippocampus. *J*  
589 *Neurosci*, 33, 17029-41.
- 590 PFEIFFER, B. E. & FOSTER, D. J. 2015. PLACE CELLS. Autoassociative dynamics in the generation  
591 of sequences of hippocampal place cells. *Science*, 349, 180-3.
- 592 QIN, C., BIAN, X.-L., WU, H.-Y., XIAN, J.-Y., CAI, C.-Y., LIN, Y.-H., ZHOU, Y., KOU, X.-L.,  
593 CHANG, L., LUO, C.-X. & ZHU, D.-Y. 2020. Dorsal Hippocampus to Infralimbic Cortex  
594 Circuit is Essential for the Recall of Extinction Memory. *Cerebral Cortex*, 31, 1707-1718.
- 595 RAMIREZ-VILLEGAS, J. F., LOGOTHETIS, N. K. & BESSERVE, M. 2015. Diversity of sharp-wave-  
596 ripple LFP signatures reveals differentiated brain-wide dynamical events. *Proc Natl Acad Sci U*  
597 *S A*, 112, E6379-87.
- 598 RASCH, B. & BORN, J. 2007. Maintaining memories by reactivation. *Curr Opin Neurobiol*, 17, 698-  
599 703.
- 600 ROUX, L., HU, B., EICHLER, R., STARK, E. & BUZSÁKI, G. 2017. Sharp wave ripples during  
601 learning stabilize the hippocampal spatial map. *Nat Neurosci*, 20, 845-853.
- 602 SIEGLE, J. H., JIA, X., DURAND, S., GALE, S., BENNETT, C., GRADDIS, N., HELLER, G.,  
603 RAMIREZ, T. K., CHOI, H., LUVIANO, J. A., GROBLEWSKI, P. A., AHMED, R.,  
604 ARKHIPOV, A., BERNARD, A., BILLEH, Y. N., BROWN, D., BUICE, M. A., CAIN, N.,  
605 CALDEJON, S., CASAL, L., CHO, A., CHVILICEK, M., COX, T. C., DAI, K., DENMAN, D.  
606 J., DE VRIES, S. E. J., DIETZMAN, R., ESPOSITO, L., FARRELL, C., FENG, D.,  
607 GALBRAITH, J., GARRETT, M., GELFAND, E. C., HANCOCK, N., HARRIS, J. A.,

- 608 HOWARD, R., HU, B., HYTNEN, R., IYER, R., JESSETT, E., JOHNSON, K., KATO, I.,  
609 KIGGINS, J., LAMBERT, S., LECOQ, J., LEDOCHOWITSCH, P., LEE, J. H., LEON, A., LI,  
610 Y., LIANG, E., LONG, F., MACE, K., MELCHIOR, J., MILLMAN, D., MOLLENKOPF, T.,  
611 NAYAN, C., NG, L., NGO, K., NGUYEN, T., NICOVICH, P. R., NORTH, K., OCKER, G. K.,  
612 OLLERENSHAW, D., OLIVER, M., PACHITARIU, M., PERKINS, J., REDING, M., REID,  
613 D., ROBERTSON, M., RONELLENFITCH, K., SEID, S., SLAUGHTERBECK, C.,  
614 STOECKLIN, M., SULLIVAN, D., SUTTON, B., SWAPP, J., THOMPSON, C., TURNER, K.,  
615 WAKEMAN, W., WHITESELL, J. D., WILLIAMS, D., WILLIFORD, A., YOUNG, R., ZENG,  
616 H., NAYLOR, S., PHILLIPS, J. W., REID, R. C., MIHALAS, S., OLSEN, S. R. & KOCH, C.  
617 2021. Survey of spiking in the mouse visual system reveals functional hierarchy. *Nature*, 592,  
618 86-92.
- 619 SIROTA, A., CSICSVARI, J., BUHL, D. & BUZSÁKI, G. 2003. Communication between neocortex  
620 and hippocampus during sleep in rodents. *Proc Natl Acad Sci U S A*, 100, 2065-9.
- 621 SOSA, M., JOO, H. R. & FRANK, L. M. 2020. Dorsal and Ventral Hippocampal Sharp-Wave Ripples  
622 Activate Distinct Nucleus Accumbens Networks. *Neuron*, 105, 725-741.e8.
- 623 STEFFENACH, H. A., WITTER, M., MOSER, M. B. & MOSER, E. I. 2005. Spatial memory in the rat  
624 requires the dorsolateral band of the entorhinal cortex. *Neuron*, 45, 301-13.
- 625 STRANGE, B. A., WITTER, M. P., LEIN, E. S. & MOSER, E. I. 2014. Functional organization of the  
626 hippocampal longitudinal axis. *Nat Rev Neurosci*, 15, 655-69.
- 627 TAKAHASHI, S. 2015. Episodic-like memory trace in awake replay of hippocampal place cell activity  
628 sequences. *Elife*, 4, e08105.
- 629 TONG, A. P. S., VAZ, A. P., WITTIG, J. H., INATI, S. K. & ZAGHLOUL, K. A. 2021. Ripples reflect  
630 a spectrum of synchronous spiking activity in human anterior temporal lobe. *Elife*, 10.
- 631 TUKKER, J. J., BEED, P., SCHMITZ, D., LARKUM, M. E. & SACHDEV, R. N. S. 2020. Up and  
632 Down States and Memory Consolidation Across Somatosensory, Entorhinal, and Hippocampal  
633 Cortices. *Front Syst Neurosci*, 14, 22.
- 634 UL HAQ, R., ANDERSON, M. L., HOLLNAGEL, J.-O., WORSCHECH, F., SHERKHELI, M. A.,  
635 BEHRENS, C. J. & HEINEMANN, U. 2016. Serotonin dependent masking of hippocampal  
636 sharp wave ripples. *Neuropharmacology*, 101, 188-203.
- 637 UL HAQ, R., LIOTTA, A., KOVACS, R., RÖSLER, A., JAROSCH, M. J., HEINEMANN, U. &  
638 BEHRENS, C. J. 2012. Adrenergic modulation of sharp wave-ripple activity in rat hippocampal  
639 slices. *Hippocampus*, 22, 516-533.
- 640 VAN STRIEN, N. M., CAPPAERT, N. L. & WITTER, M. P. 2009. The anatomy of memory: an  
641 interactive overview of the parahippocampal-hippocampal network. *Nat Rev Neurosci*, 10, 272-  
642 82.
- 643 VAZ, A. P., INATI, S. K., BRUNEL, N. & ZAGHLOUL, K. A. 2019. Coupled ripple oscillations  
644 between the medial temporal lobe and neocortex retrieve human memory. *Science*, 363, 975-  
645 978.
- 646 VOGEL, J. W., LA JOIE, R., GROTHE, M. J., DIAZ-PAPKOVICH, A., DOYLE, A., VACHON-  
647 PRESSEAU, E., LEPAGE, C., VOS DE WAEL, R., THOMAS, R. A., ITURRIA-MEDINA, Y.,  
648 BERNHARDT, B., RABINOVICI, G. D. & EVANS, A. C. 2020. A molecular gradient along  
649 the longitudinal axis of the human hippocampus informs large-scale behavioral systems. *Nat*  
650 *Commun*, 11, 960.
- 651 WANG, D., YAU, H.-J., BROKER, C., TSOU, J.-H., BONCI, A. & IKEMOTO, S. 2015. Mesopontine  
652 median raphe regulates hippocampal ripple oscillation and memory consolidation. *Nature*  
653 *neuroscience*, 18.
- 654 WITTER, M. P. 2007. Intrinsic and extrinsic wiring of CA3: indications for connectional heterogeneity.  
655 *Learn Mem*, 14, 705-13.
- 656 XU, H., BARACSKAY, P., O'NEILL, J. & CSICSVARI, J. 2019. Assembly Responses of Hippocampal  
657 CA1 Place Cells Predict Learned Behavior in Goal-Directed Spatial Tasks on the Radial Eight-  
658 Arm Maze. *Neuron*, 101, 119-132.e4.

- 659 YLINEN, A., BRAGIN, A., NÁDASDY, Z., JANDÓ, G., SZABÓ, I., SIK, A. & BUZSÁKI, G. 1995.  
660 Sharp wave-associated high-frequency oscillation (200 Hz) in the intact hippocampus: network  
661 and intracellular mechanisms. *J Neurosci*, 15, 30-46.
- 662 ZHANG, Y., CAO, L., VARGA, V., JING, M., KARADAS, M., LI, Y. & BUZSÁKI, G. 2021.  
663 Cholinergic suppression of hippocampal sharp-wave ripples impairs working memory. *Proc Natl*  
664 *Acad Sci U S A*, 118.
- 665



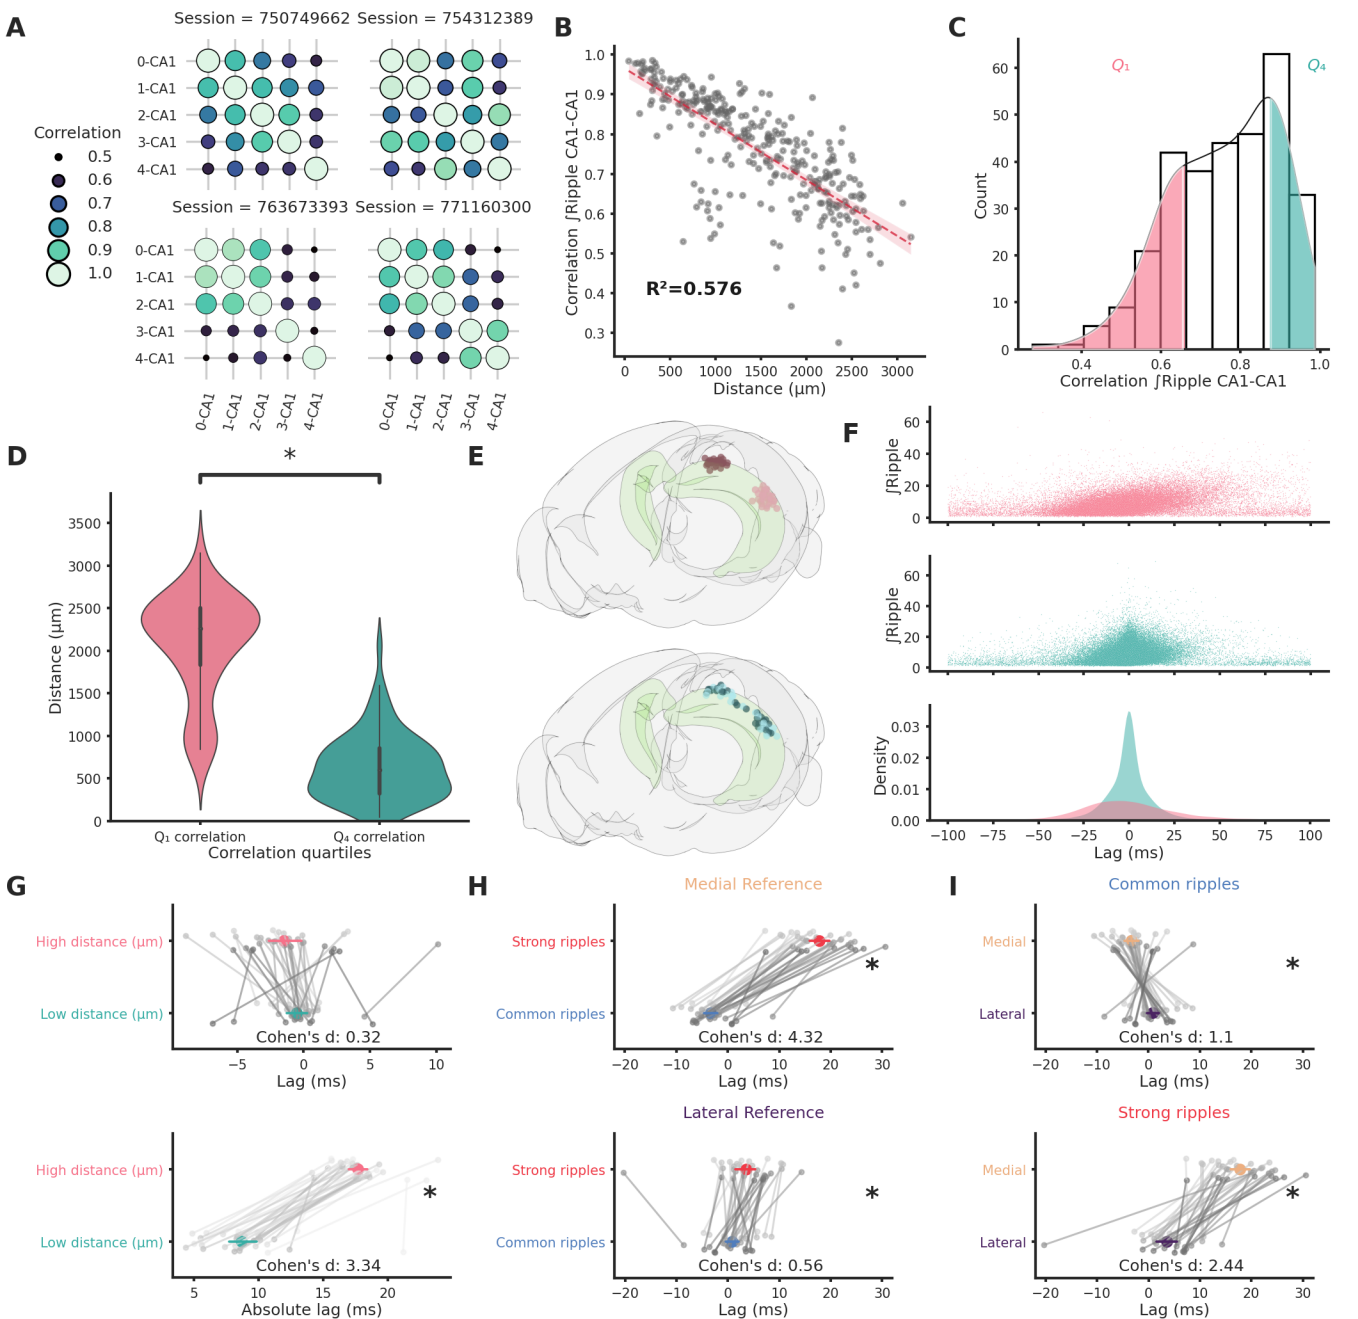

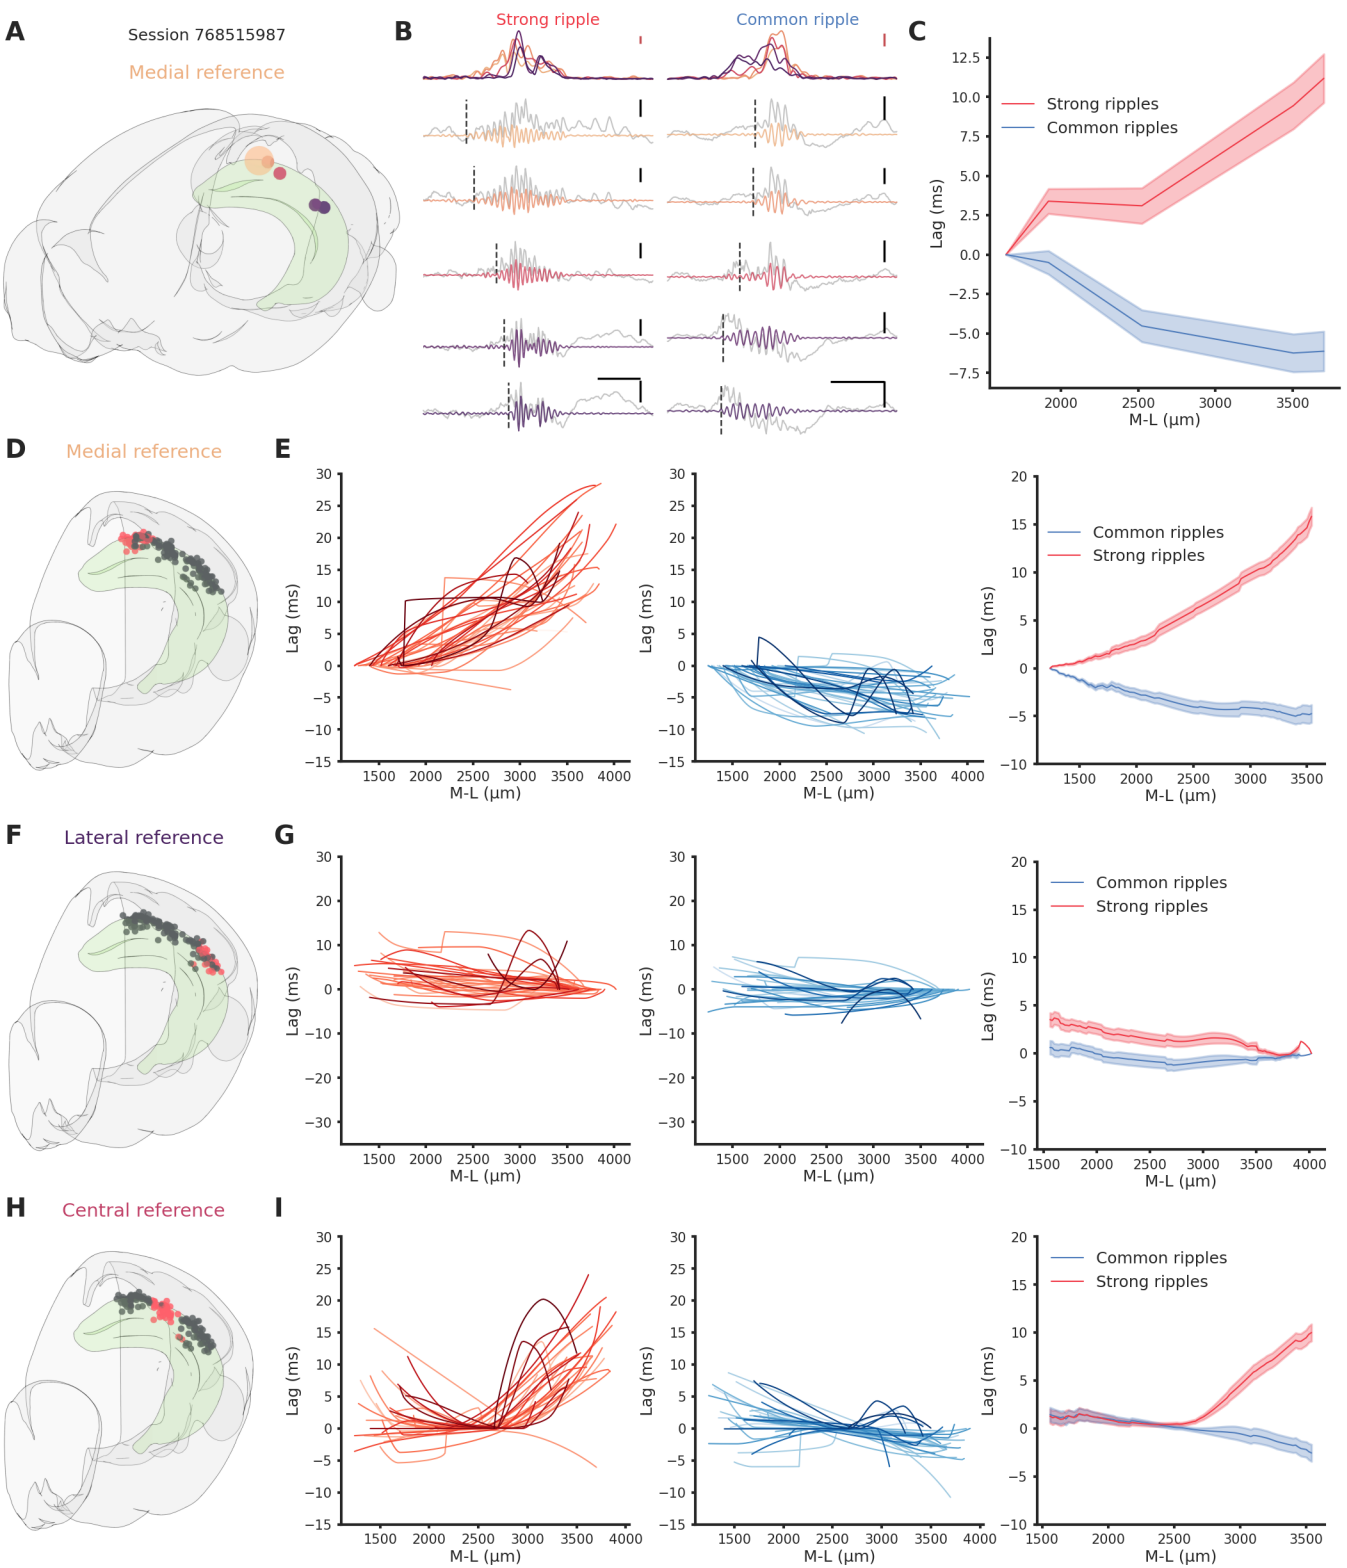

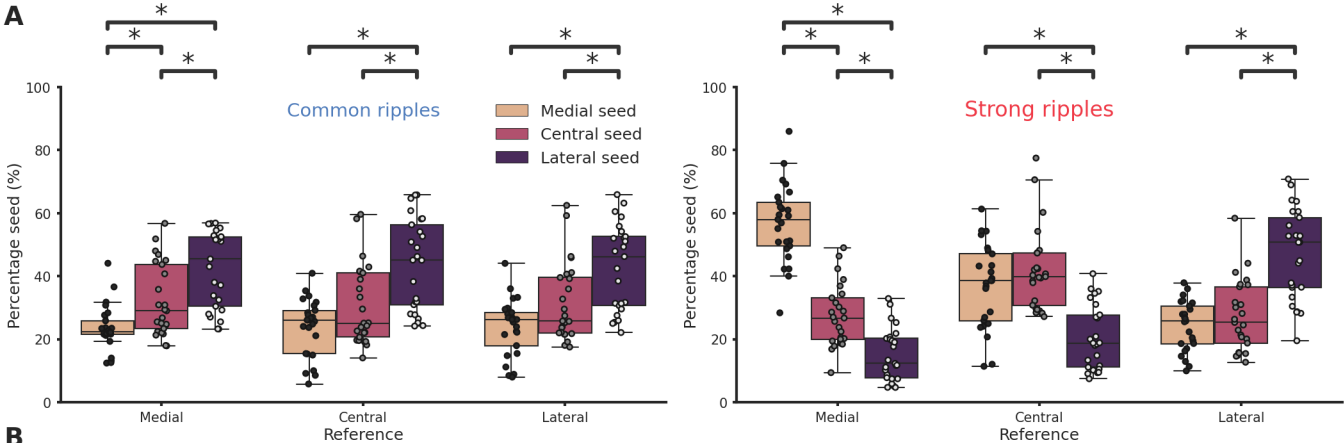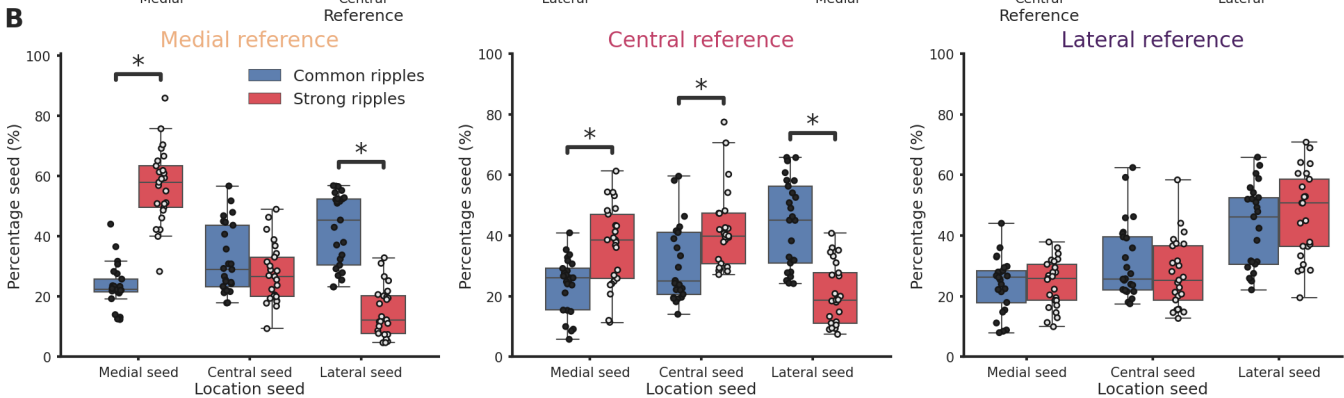

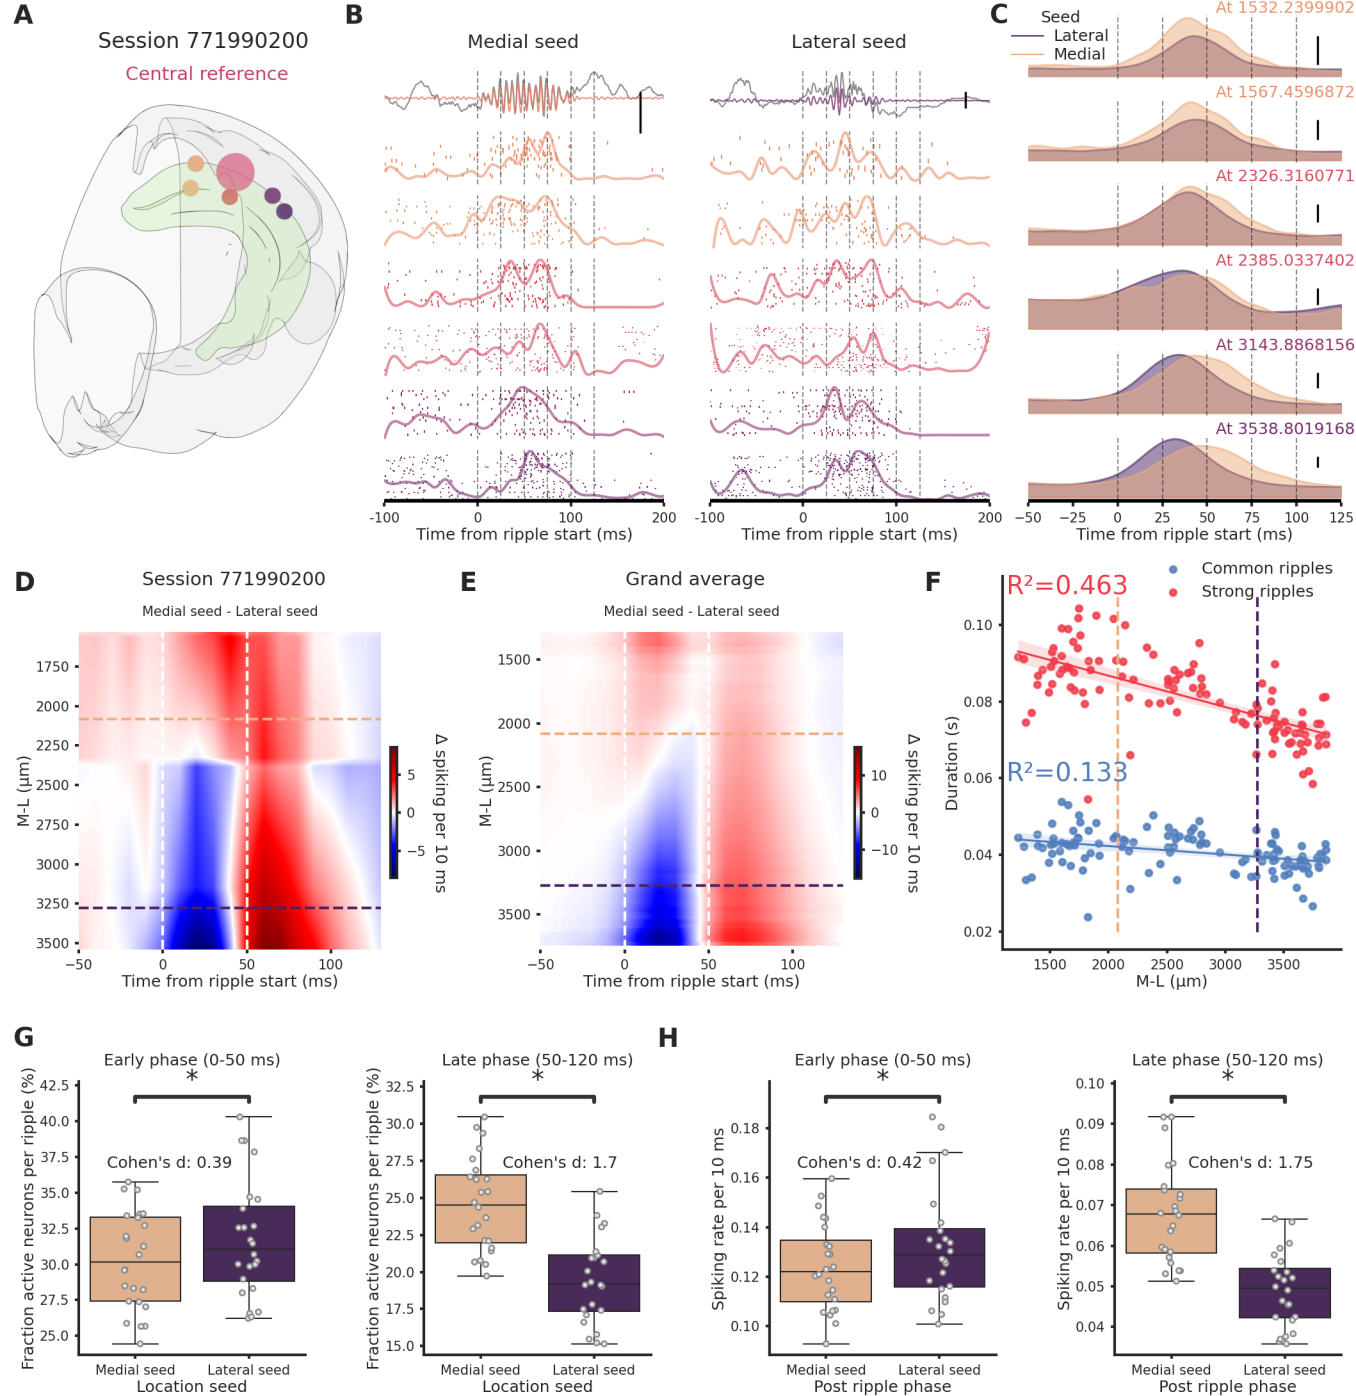

## Supplementary Figures

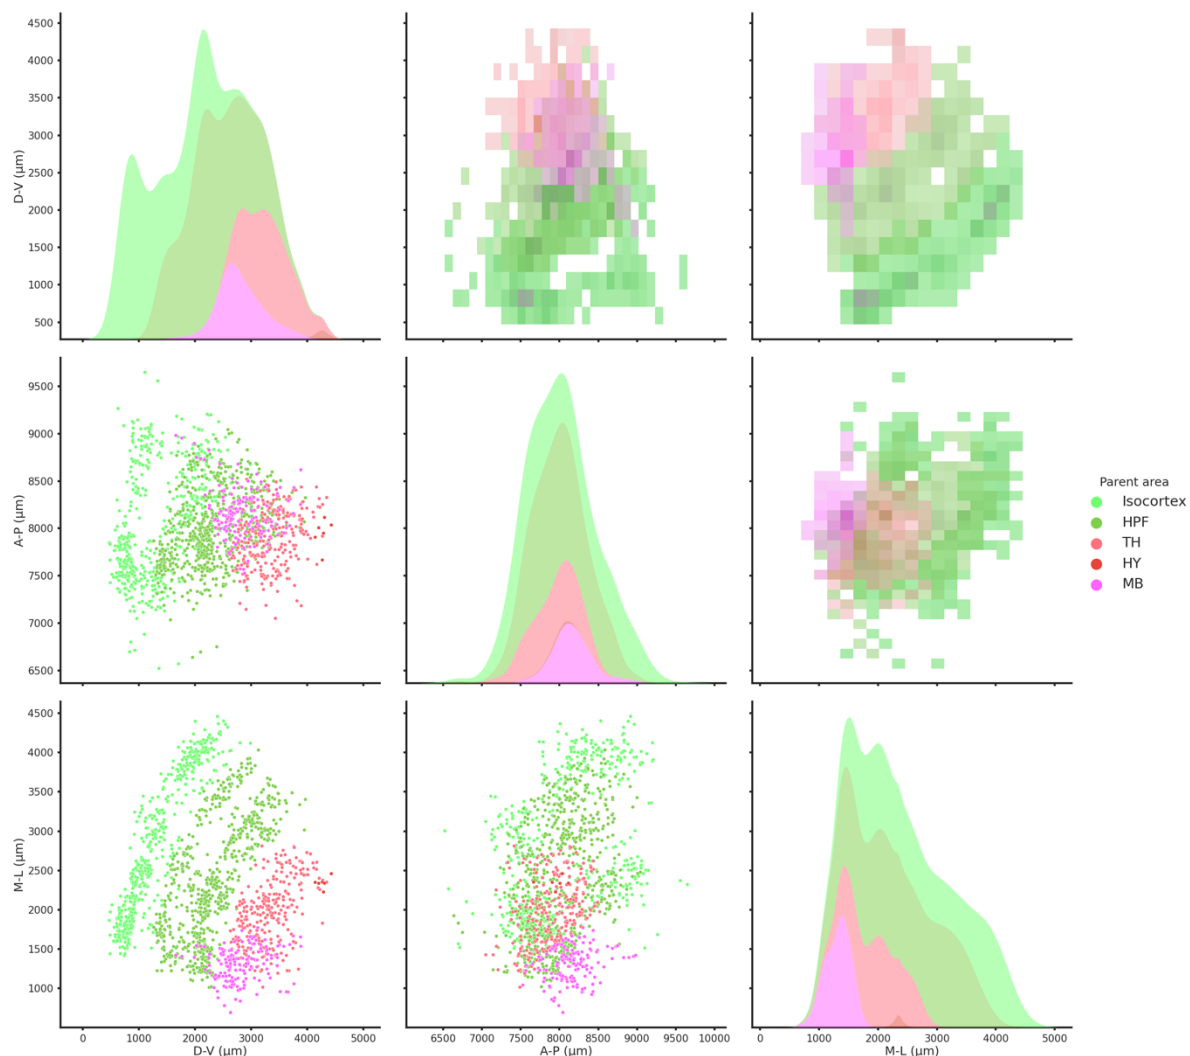

### Supplementary Figure 1. Spatial coordinates of all recorded brain regions.

2D histograms (upper diagonal), scatter plots (lower diagonal) and kernel density estimate plots (diagonal) of all the recorded regions color-coded according to the Allen Institute color scheme. HPF=hippocampus, TH=thalamus, HY=hypothalamus and MB=midbrain. M-L axis is zeroed at the midline.

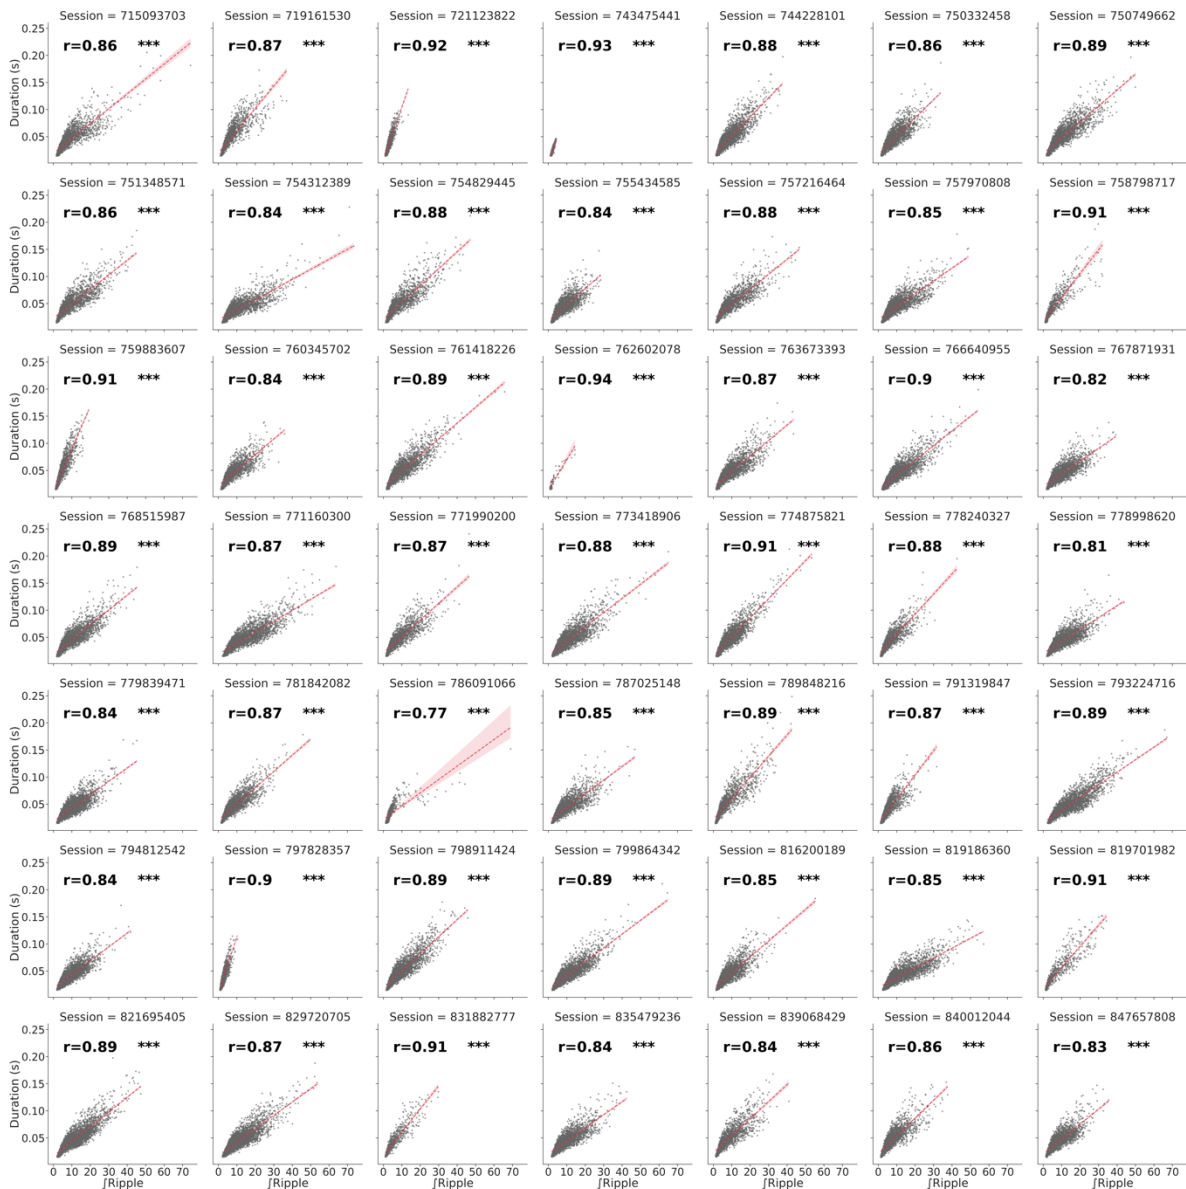

## Supplementary Figure 2. Correlation between ripple duration and strength per session.

Red line represents linear regression with confidence interval of 95% estimated via bootstrap. \*\*\* means  $p < 0.0005$ .

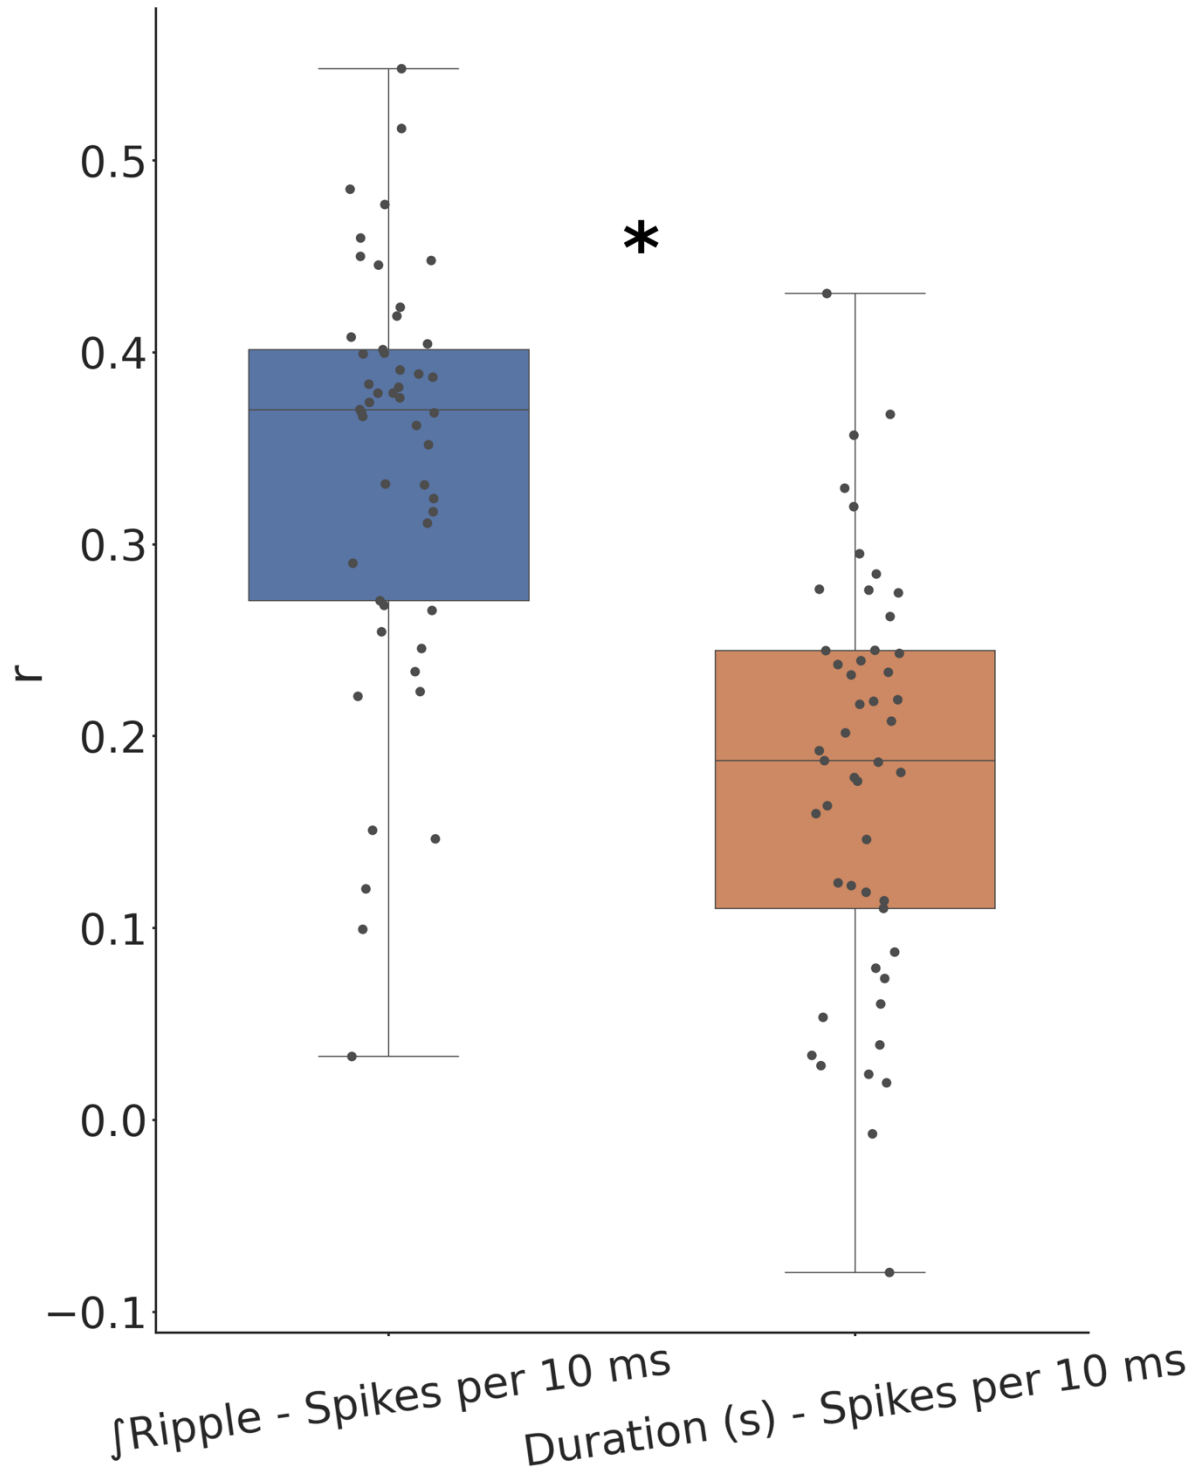

### **Supplementary Figure 3. Comparison between correlation of ripple strength and duration with underlying spiking.**

Ripple strength correlates significantly better with the underlying ripple spiking activity. \* means  $p < 0.0005$ .





distribution of  $\int$ Ripple and RIVD z-scored per session, hippocampal regions (text in green) show the biggest responses.

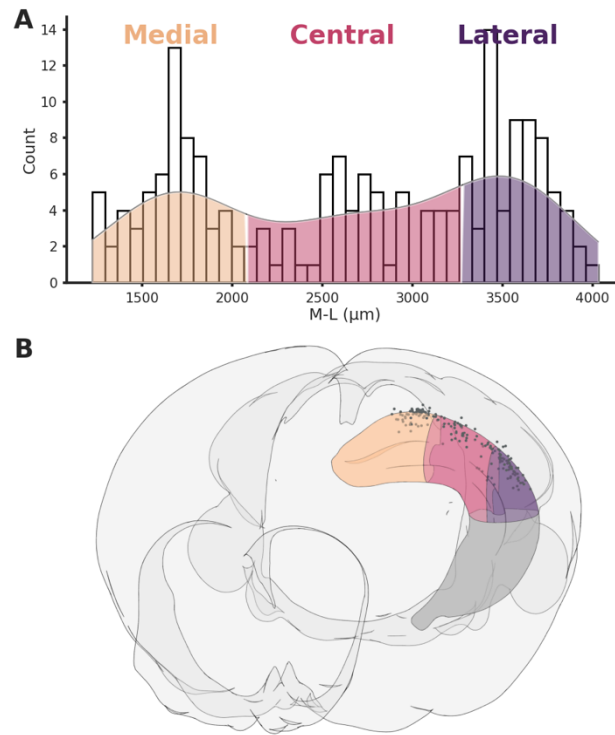

### Supplementary Figure 5. Hippocampal sections.

(A) Histogram showing the three sections across the M-L axis, the hippocampus was divided in order to have an equal number of recordings in each section. (B) Rendering of the 3 sections and associated recording locations (black dots).

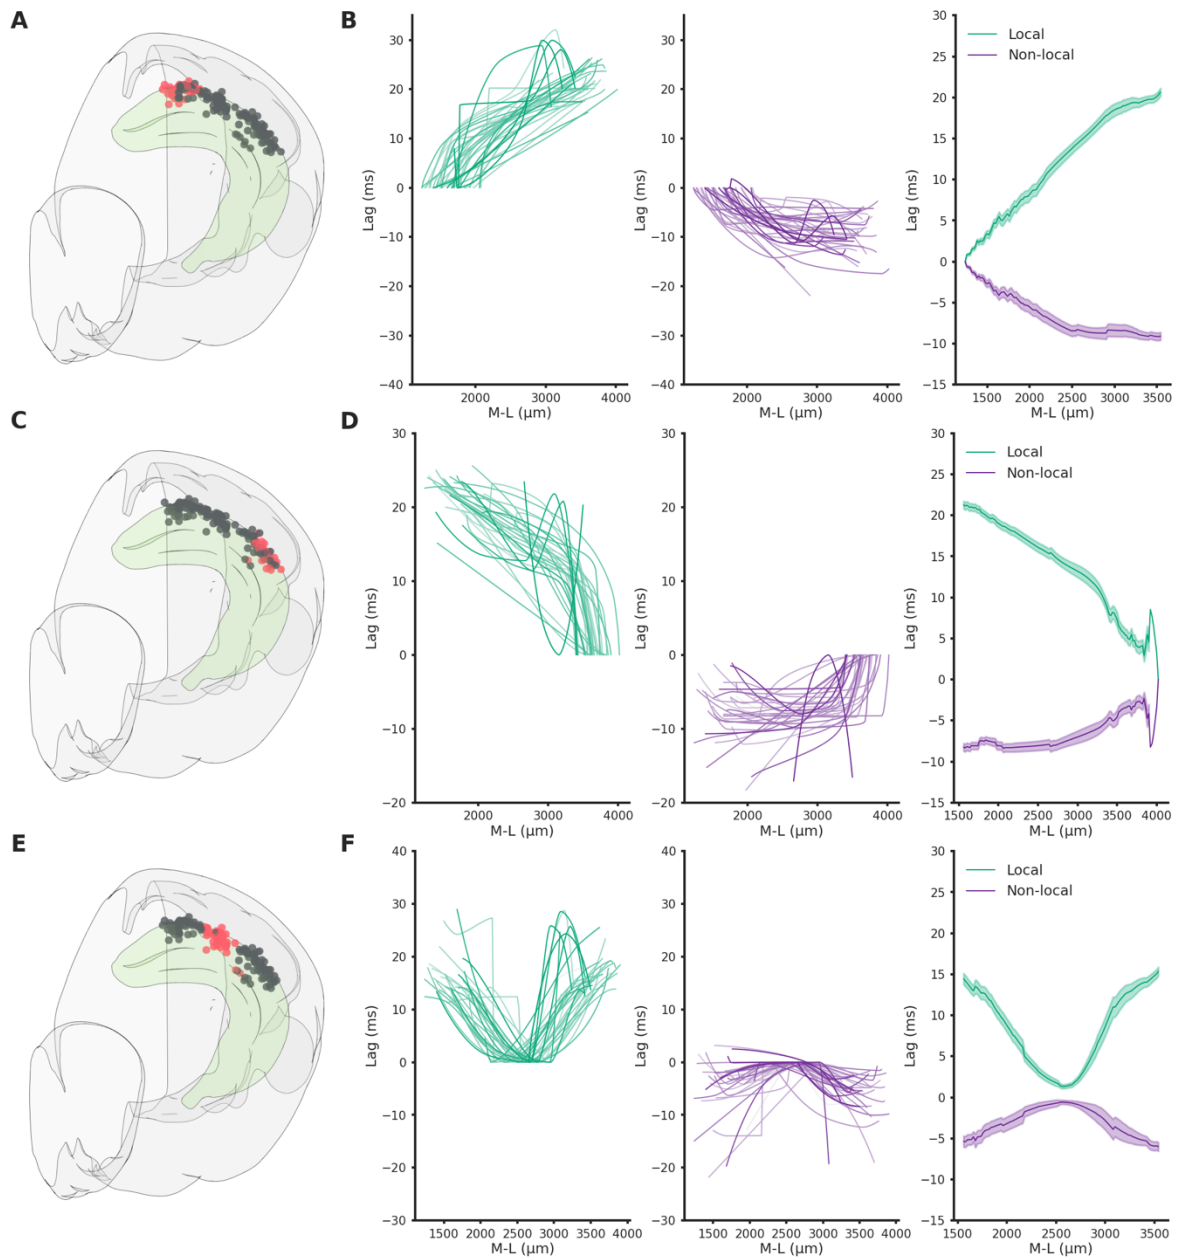

### Supplementary Figure 6. Spatio-temporal lag maps of locally and not locally generated ripples

Spatio-temporal profiles are symmetrical, strong indication of similar propagation speed regardless of seed position. (A) Recording locations relative to (B). Red circles represents the reference locations across all sessions (n sessions=41), black circles represents the remaining recording locations. (B) Left: Medio-lateral propagation of locally generated ripples (generated in the reference section), each line represents the average of one session. Middle: Medio-lateral propagation of non-locally generated ripples, each line represents the average of one session. Right: Average propagation

map across sessions of strong and common ripples. Reference locations are the most lateral per session. (C) Same as A. (D) Same as B. Reference locations are the most lateral per session. (E) Same as A. (F) Same as B. Reference locations are the most central per session.

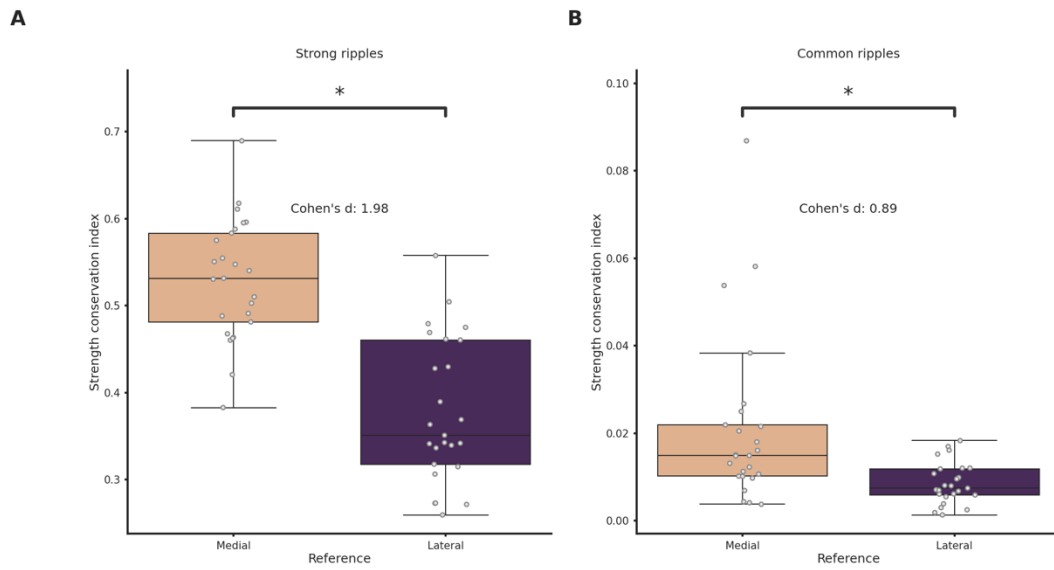

### Supplementary Figure 7. Strength conservation in medially and laterally generated ripples.

(A) Strength conservation index in strong ripples grouped by reference location. Ripples generated in the lateral section shows significantly lower strength conservation ( $p=7e-09$ , Student's t-test). (B) Strength conservation index in common ripples grouped by reference location.

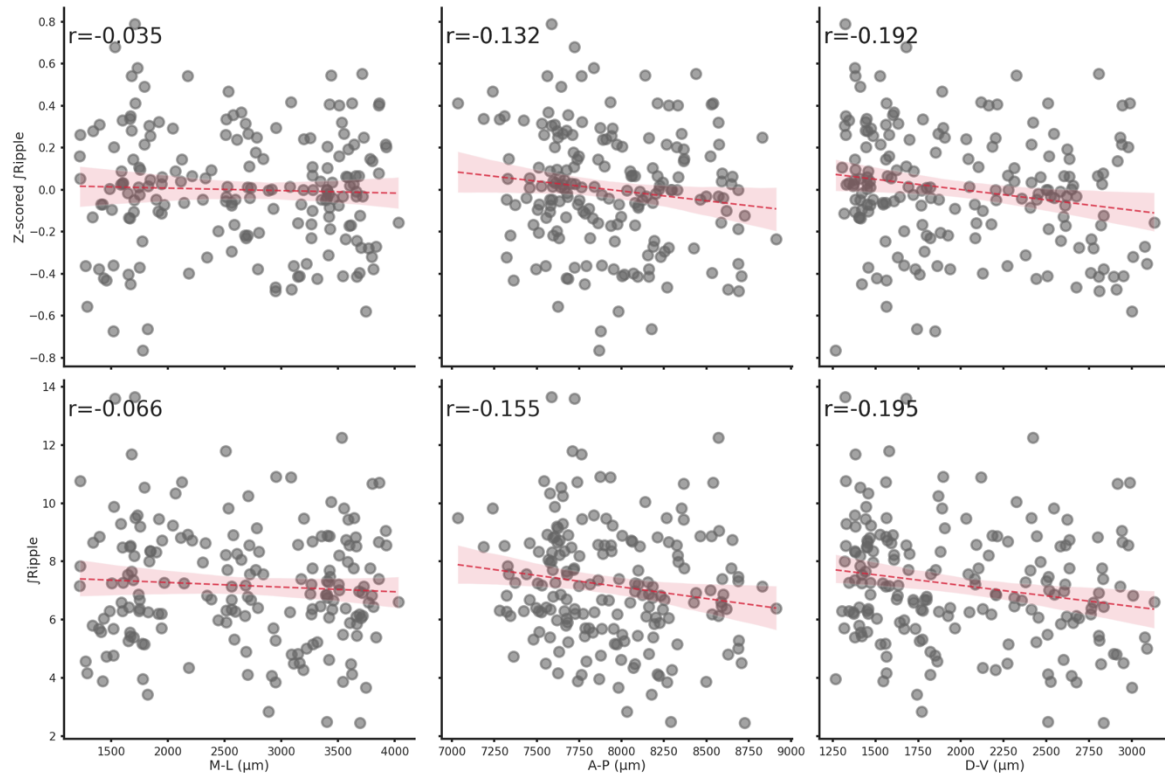

### Supplementary Figure 8. Spatial location does not influence $\int$ Ripple.

Relationship between Z-scored  $\int$ Ripple (top row) or  $\int$ Ripple (bottom row) and each spatial axis (M-L, A-P or D-V). Spatial location has a negligible effect on  $\int$ Ripple.

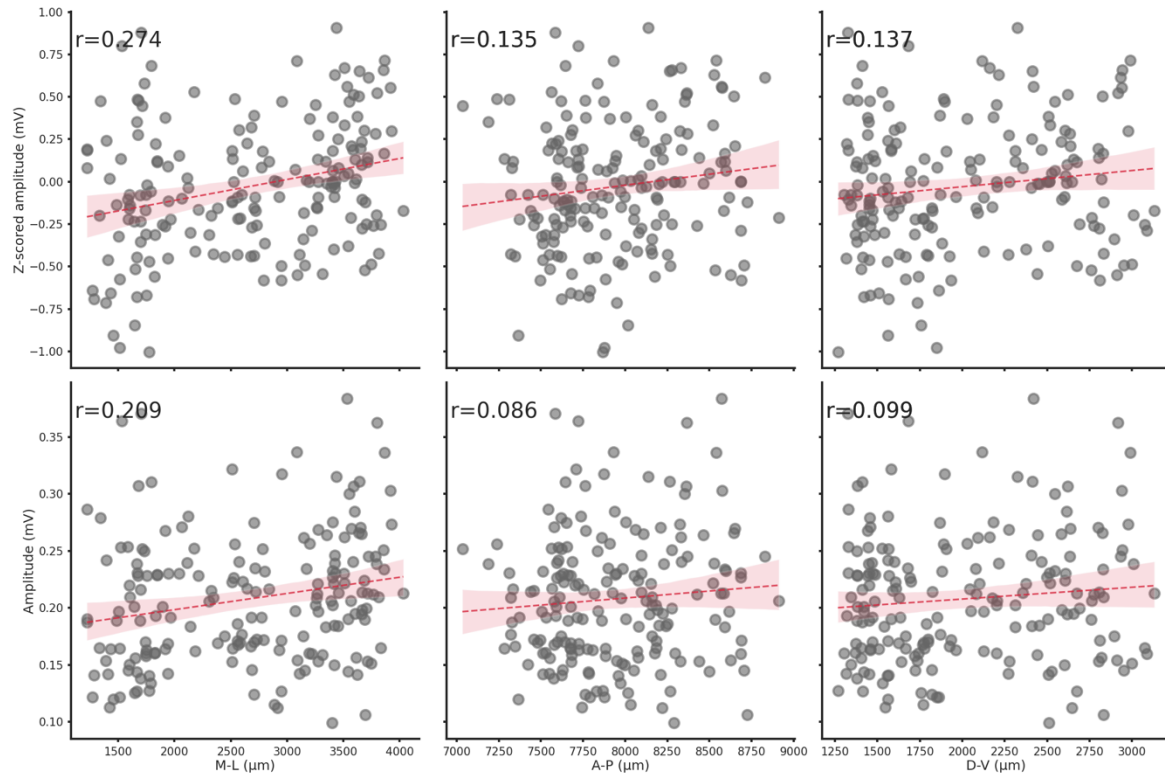

**Supplementary Figure 9. Spatial location does not influence ripple amplitude.**

Relationship between Z-scored amplitude (top row) or amplitude (bottom row) and each spatial axis (M-L, A-P or D-V). Spatial location has a negligible effect on ripple amplitude.



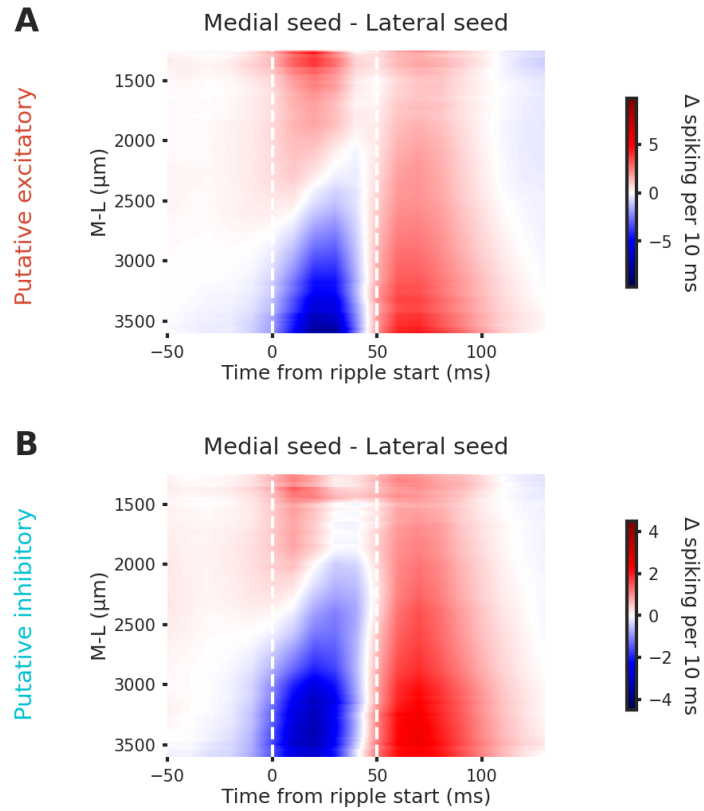

**Supplementary Figure 10. Putative excitatory and inhibitory neurons show similar spiking patterns in lateral and medial ripples.**

Grand average of the differences between medial and lateral ripples induced spiking activity in putative excitatory (A) and inhibitory neurons (B).

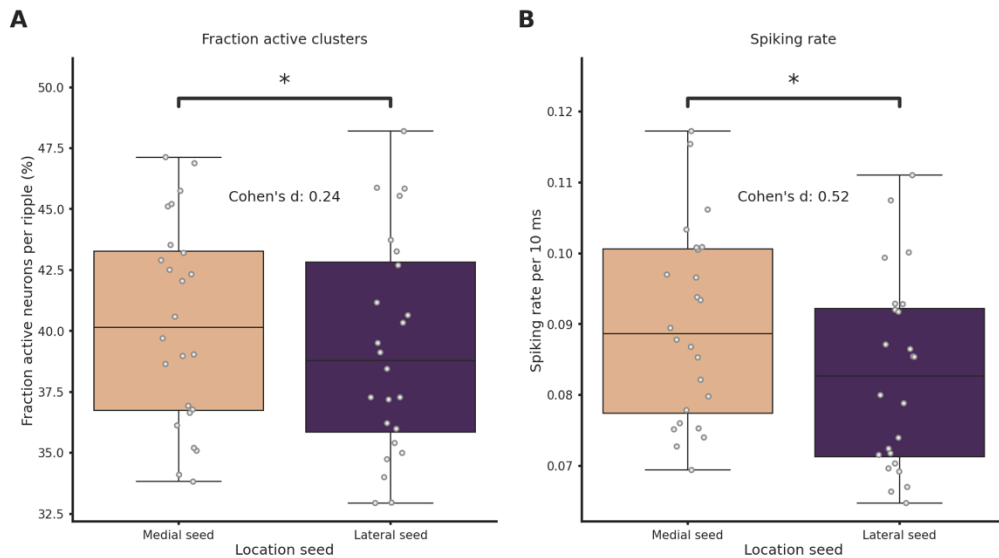

### Supplementary Figure 11. Spiking rate and fraction of active neurons are significantly higher in medial ripples

(A) Fraction of active neurons per ripple grouped by ripple seed location. (Medial seed= $40.0 \pm 1.0\%$ , lateral seed= $39.0 \pm 1.0\%$ , p-value= $9.52e-05$ , Student's t-test). (B) Average spiking rate grouped per ripple grouped by ripple seed location (Medial seed= $9.0 \pm 0.0\%$ , lateral seed= $8.0 \pm 0.0\%$ , p-value= $5.20e-10$ , Student's t-test). Asterisks mean  $p < 0.05$ , Student's t-test.

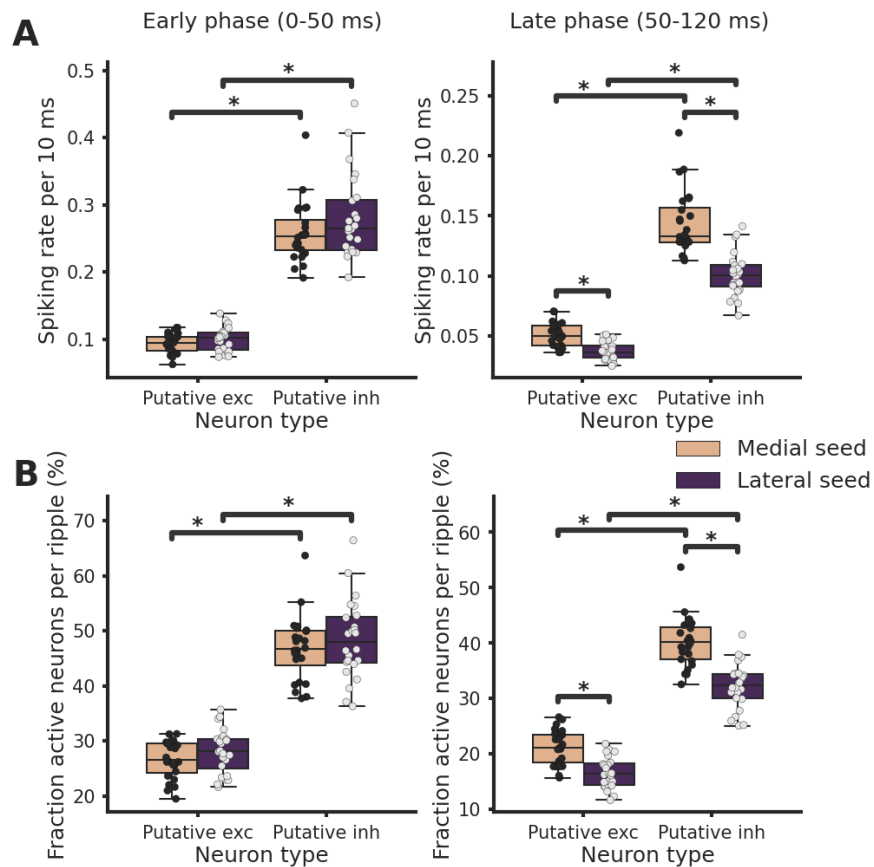

**Supplementary Figure 12. Spiking rate and fraction of active neurons are increased in the late phase post-ripple start in medial ripples both in putative excitatory and inhibitory neurons.**

(A) Average spiking rate in early (left) and late (right) phase post-ripple start grouped by ripple seed location and putative neuron identity. Asterisks mean  $p < 0.05$ , ANOVA with pairwise Tukey post-hoc test. (B) Fraction of active neurons per ripple in early (left) and late (right) phase post-ripple start grouped by ripple seed location and putative neuron identity. Asterisks mean  $p < 0.05$ , ANOVA with pairwise Tukey post-hoc test.

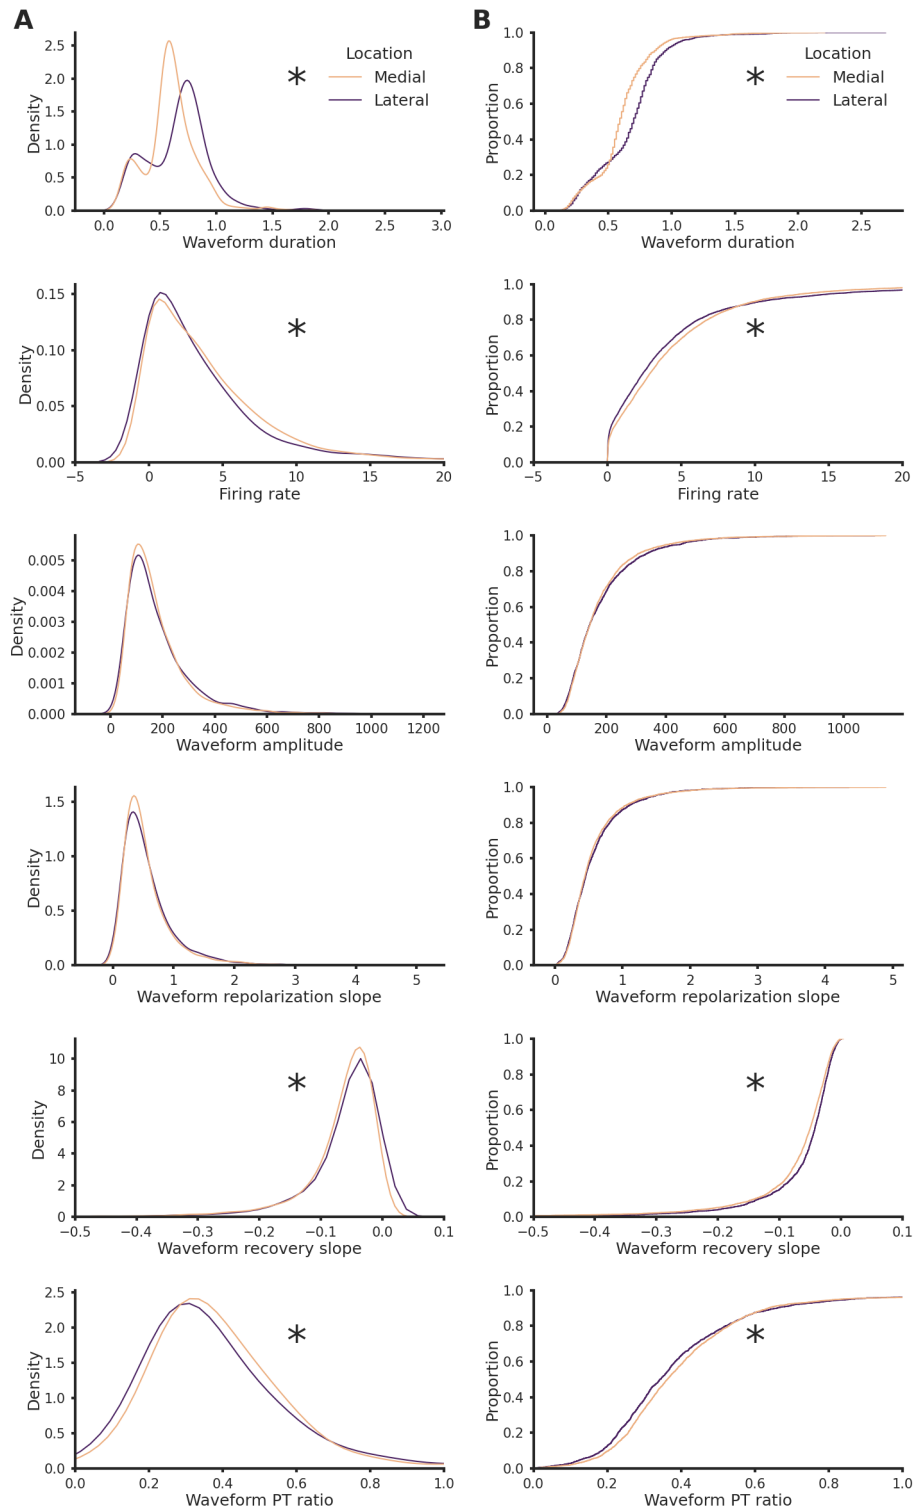

### Supplementary Figure 13. Units features in medial and lateral sections

(A) Kernel density estimate plot of waveform duration (p-value=1.64e-33), firing rate (p-value=6.41e-01), waveform amplitude (p-value=5.48e-01), waveform

repolarization slope (p-value=4.09e-01), waveform recovery slope (p-value=1.13e-10) and waveform peak-through ratio (p-value=5.42e-05) grouped by hippocampal section. Asterisks mean  $p < 0.05$ , Mann-Whitney U test. (B) Cumulative distribution plot of waveform duration (p-value=0.00e+00), firing rate (p-value=9.26e-03), waveform amplitude (p-value=9.09e-02), waveform repolarization slope (p-value=6.90e-02), waveform recovery slope (p-value=1.58e-10) and waveform peak-through ratio (p-value=2.27e-05) grouped by hippocampal section. Asterisks mean  $p < 0.05$ , Kolgomorov-Smirnov test.
